1 Novel insights into the morphology of *Plesiochelys bigleri* from the  
2 early Kimmeridgian of Northwestern Switzerland

3 Novel insights into the morphology of *Plesiochelys bigleri*  
4

5 Irena Raselli<sup>1,2</sup>, Jérémy Anquetin<sup>1,2</sup>  
6

7 <sup>1</sup> Jurassica Museum, Route de Fontenais 21, 2900 Porrentruy, Switzerland  
8

9 <sup>2</sup> Department of Geosciences, University of Fribourg, Chemin du musée 6, 1700 Fribourg,  
10 Switzerland  
11

12 Contact: [irena.raselli@hotmail.com](mailto:irena.raselli@hotmail.com)  
13

14 Both authors contributed equally to this research  
15

## 16 Abstract

17 Plesiochelyidae were relatively large coastal marine turtles, which inhabited the  
18 epicontinental seas of Western Europe during the Late Jurassic. Their fossil record can be  
19 tracked in Germany, Switzerland, the United Kingdom, France, Spain and Portugal. The Jura  
20 Mountains, in northwestern Switzerland, have been the main source for the study of this  
21 group, mostly thanks to the rich and famous historical locality of Solothurn. In the last two  
22 decades, numerous plesiochelyid remains have been collected from Kimmeridgian deposits  
23 (Lower *Virgula* Marls and Banné Marls) in the area of Porrentruy (Canton of Jura,  
24 Switzerland). This material was revealed by construction works of the A16 Transjurane  
25 highway between 2000 and 2011, and led to the recent description of the new species  
26 *Plesiochelys bigleri*. In the years 2014 and 2016, new fragmentary turtle material was  
27 collected from the Banné Marls (Reuchenette Formation, lower Kimmeridgian) near the  
28 village of Glovelier, Canton of Jura, Switzerland. The new material consists of a complete  
29 shell, additional shell elements, a few bones from the appendicular and vertebral skeleton, and  
30 a fragmentary basicranium. This material can be confidently assigned to the species *P. bigleri*.  
31 It supports the presence of this species in the Banné Marls, slightly extends its spatial  
32 distribution and confirms the differences with the closely related species *P. etalloni*. The new  
33 material reveals that the split between the cerebral and palatine branches of the internal  
34 carotid artery occurs in a vertical plane in *P. bigleri*. This condition could not be observed in  
35 the type material due to poor preservation. This new character clearly distinguishes *P. bigleri*  
36 from *P. etalloni* and seems to be unique among thalassochelydians.

## 37 Introduction

38 Thalassocheyleia is a clade of coastal marine turtles that diversified mostly in Europe  
39 during the Late Jurassic (for a review, see [1]). Some thalassocheyleians, namely the  
40 Eurysternidae Dollo, 1886 [2], were of small to medium size and lived primarily in lagoons  
41 and near-shore environments. Other thalassocheyleians, such as the Plesiocheyleidae Baur,  
42 1888 [3] and Thalassemydidae Zittel 1889 [4], reached larger sizes (over 40 cm in carapace  
43 length) and were thought to thrive in more open marine conditions. However, the absence of  
44 stiffened paddles suggests that these turtles remained relatively close to the coast and were not  
45 able to cross large oceanic expanses [1]. Historically, the most productive localities for  
46 thalassocheyleians were Solothurn in Switzerland and several plattenkalk localities in France  
47 and southern Germany (see [1] and references therein). In the past 20 years, extensive  
48 excavations have been carried out in northwestern Switzerland for the construction of the A16  
49 Transjurane highway and have led to the discovery of several vertebrate-bearing layers in the  
50 Kimmeridgian of the region of Porrentruy, Canton Jura, Switzerland [5]. Two stratigraphical  
51 layers were particularly productive for vertebrates: the upper Kimmeridgian Lower *Virgula*  
52 Marls and the lower Kimmeridgian Banné Marls [6,7]. Thalassocheyleians were among the  
53 most common vertebrates with around a hundred of more or less complete shells, a few skulls  
54 and several thousands of isolated remains [8]. The turtle material from the Kimmeridgian of  
55 the Porrentruy region was recently described in a series of papers [9–12]. Most of this  
56 material is referable to two closely-related species: *Plesiocheyleys etalloni* and *Plesiocheyleys*  
57 *bigleri* [11].  
58 In the present paper, we describe new turtle material from the lower Kimmeridgian Banné  
59 Marls in Glovelier, Canton Jura, Switzerland, including a basicranium and a near complete  
60 shell. This material can be confidently referred to *Plesiocheyleys bigleri* and provides new  
61 important information on this recently described species.

62

## 63 Material and Methods

64

### 65 Material

66 The material presented herein was found in two times. A first limestone block was  
67 collected in 2014 by the first author. It contained the fragmentary remains of a shell (some  
68 costals and two peripherals), a partial scapula and a fragment of the basicranium. Two years  
69 later, new turtle material was recovered at the exact same spot in the outcrop. This turned out  
70 to be a near complete shell with some elements of the appendicular and axial skeleton (see  
71 below), and a poorly preserved fragment of a costal. One of the peripherals found in 2014  
72 belongs to the near complete shell found in 2016 and was replaced during preparation. This  
73 confirms that all of this material was associated in the field.

74 MJSN CBE-0001 corresponds to most of the postcranial material collected in 2014,  
75 including an articulated fragment of the carapace (left costals 5–7 and peripherals 8 and 9),  
76 fragments of costals, an isolated peripheral, and a partial right scapula. MJSN CBE-0002  
77 consists of a fragmentary basicranium and associated columella auris found in 2014. MJSN  
78 CBE-0003 corresponds to the near complete shell found in 2016. Associated with this shell,  
79 are a cervical and a caudal vertebrae, the left femur, the right pubis (still embedded in the  
80 matrix), and a poorly preserved fragment of a costal that evidently pertains to another  
81 individual.

82 The material discussed herein belongs at least to two individuals, represented by the  
83 articulated carapace fragment (MJSN CBE-0001) and the near complete shell (MJSN CBE-  
84 0003). The basicranium (MJSN CBE-0002) may belong to either of these individuals, or less  
85 likely represent a third one.

86

## 87 Geological setting

88 The new material was collected from the Banné Marls at a locality called Combe du Bé  
89 (CBE; 47° 20' 08'' N, 7° 11' 29'' E) near the village of Glovelier, Canton of Jura,  
90 Switzerland (Fig. 1). The Banné Marls belong to the Reuchenette Formation and are dated  
91 from the Cymodoce ammonite zone (late early Kimmeridgian; Fig. 2; [7]), which makes them  
92 somewhat older than the Lower *Virgula* Marls (middle of the Reuchenette Formation,  
93 Eudoxus ammonite zone; [7]) and the famous Solothurn Turtle Limestone (top of the  
94 Reuchenette Formation, Autissiodorensis ammonite zone; [6,13]).

95 The Banné Marls consist of fossiliferous marly limestones rich in bivalves, gastropods,  
96 brachiopods, echinoderms and cephalopods, as well as remains of vertebrates such as  
97 crocodylomorphs, turtles and fishes representing a diverse coastal marine biocenosis [7].  
98 *Tropidemys langii* is the most common turtle taxon in this layer [9]. The new turtle material  
99 presented herein was found at the base of the Banné Marls, just above the hardground (Fig. 2).

100

101 **Fig. 1. Map of the locality.** The star marks the location of the outcrop in the small valley  
102 Combe du Bé near Glovelier, Canton of Jura, northwestern Switzerland.

103 **Fig. 2. Stratigraphical column of the Reuchenette Formation in northwestern**  
104 **Switzerland.** The shell marks the position of the new specimens in the Banné Marls (CBE:  
105 Combe du Bé, name of the locality). Modified from Püntener et al. [11].

106

## 107 Comparative anatomy

108 The new material from Glovelier was primarily compared with the rich coeval  
109 Kimmeridgian turtle assemblage described recently from Courtedoux and Porrentruy, Canton  
110 of Jura, Switzerland (for an overview see [8] and references therein). The material referable to  
111 the species *Plesiochelys etalloni* and *Plesiochelys bigleri* was described in detail by Püntener

112 et al. [11]. Comparisons also included recently revised material of *Plesiochelys* spp. from  
113 other parts of Switzerland and Europe [12,14–16].

114 First hand comparisons were made, notably for cranial anatomy, with the type material of  
115 *Plesiochelys bigleri* (MJSN TCH007-252 and MJSN TCH006-1451) and with beautifully  
116 preserved specimens of *Plesiochelys etalloni* from Solothurn (NMS 40870 and NMS 40871).  
117 The anatomical description of the cranium follows the nomenclature of Gaffney [17,18],  
118 updated by Rabi et al. [19]. The description of shell material follows the nomenclature of  
119 Zangerl [20].

120

## 121 3D models

### 122 Crania

123 The following crania were micro CT-scanned in order to gain insight into their internal  
124 anatomy and to look for potential differences of systematic value: MJSN CBE-0002, MJSN  
125 TCH007-252 (holotype of *Plesiochelys bigleri*), and NMS 40870 (*Plesiochelys etalloni*). The  
126 scans have been obtained at the University of Fribourg (Department of Geosciences). Scan  
127 specifications are listed in Table 1. The scans of specimens TCH007-252 (holotype of  
128 *Plesiochelys bigleri*), and NMS 40870 (*Plesiochelys etalloni*) were segmented with the 3D  
129 software Amira 6.0. The 3D models of the skulls and isolated bones can be accessed on  
130 MorphoSource (see data availability). The scan of the Glovelier specimen, MJSN CBE-0002,  
131 was not segmented due to insufficient contrast between the bone and the matrix.

132

133 **Table 1:** Scan specifications for the examined specimens.

| Specimen      | Micro CT-Scanner | Voltage [kV] | Current [ $\mu$ A] | Filter [mm] | Rotation steps [°] | Voxel size [ $\mu$ m] |
|---------------|------------------|--------------|--------------------|-------------|--------------------|-----------------------|
| MJSN CBE-0002 |                  | 80           | 606                | Ti 0.5      | 0.2                | 25                    |

|                     |                        |     |    |   |     |    |
|---------------------|------------------------|-----|----|---|-----|----|
| MJSN TCH007-<br>252 | Bruker SkyScan<br>2211 | 190 | 50 | - | 0.2 | 39 |
| NMS 40870           |                        | 190 | 59 | - | 0.2 | 53 |

134

## 135 Shell

136 The near complete shell MJSN CBE-0003 suffered only minor postmortem deformation  
137 and represents the best specimen to document the natural 3D shape of the shell of  
138 *Plesiochelys bigleri* (see below). In order to facilitate future comparisons, this shell was  
139 scanned with a structured-light surface scanner (Artec Space Spider, Artec Group), and a 3D  
140 model was computed with the software Artec Studio 13 Professional. The 3D model of the  
141 shell can be accessed on MorphoSource (seedata availability).

## 142 Abbreviations

143

144 Institutions **MJSN**: Jurassica Museum (formerly Musée jurassien des sciences naturelles),  
145 Porrentruy, Switzerland

146 **NMS**: Naturmuseum Solothurn, Solothurn, Switzerland

147 **NMBE** : Naturhistorisches Museum Bern, Bern, Switzerland

148 Localities **CBE**: Combe du Bé, Glovelier, Switzerland

149 **TCH**: Tchèfoué, Courtedoux, Switzerland

150

151

## 152 Systematic Paleontology

153

154 TESTUDINES Batsch, 1788 [21]

155 PAN-CRYPTODIRA Joyce, Parham & Gauthier, 2004 [22]

156 THALASSOCHELYDIA Anquetin, Püntener & Joyce, 2017 [1]

157 PLESIOCHELYIDAE Baur, 1888 [3]

158 ***Plesiochelys* Rüttimeyer, 1873 [23]**

159 Type species: *Plesiochelys solodurensis* Rüttimeyer, 1873 [23]

160

161 ***Plesiochelys bigleri* Püntener, Anquetin & Billon-Bruyat, 2017 [11]**

162

163 Type material: MJSN TCH007-252 (holotype), a disarticulated shell, consisting of the sub-  
164 complete carapace, the epiplastra, entoplastron, hypoplastra and left xiphiplastron, the  
165 posterior part of the cranium, and some elements of the appendicular skeleton [11]. MJSN  
166 TCH006-1451 (paratype), an isolated partial cranium [11].

167 Type locality and horizon: Tchâfoué (TCH), Courtedoux, close to Porrentruy, Canton of  
168 Jura, Switzerland. Lower *Virgula* Marls, Chevenez Member, Reuchenette Formation, late  
169 Kimmeridgian [6,7].

170 Occurrence: Early and late Kimmeridgian of the Porrentruy region, Canton of Jura,  
171 Switzerland [11]; early Kimmeridgian of Glovelier, Canton of Jura, Switzerland (this study).

172 Diagnosis: see [11] and [1].

173 Referred material: MJSN CBE-0001, shell fragments including articulated and isolated  
174 costals, a peripheral, and a partial scapula; MJSN CBE-0002, a partial basicranium with the  
175 left otic chamber and columella auris; MJSN CBE-0003, a near complete shell with the left  
176 femur, right pubis, a cervical vertebra, and a caudal vertebra.



## 177 Description

178

179 The anatomy of *Plesiochelys bigleri* was recently described in detail [11]. The following  
180 description is therefore rather concise and focuses mainly on the new insights provided by the  
181 new material from Glovelier.

182

## 183 Cranium

184 MJSN CBE-0002 consists of an incomplete basicranium and left otic chamber (Fig. 3). As  
185 preserved, the specimen is 31 mm in length and 40 mm in width. The medial half of a  
186 columella auris is preserved as well. The parietals, squamosals, postorbitals, quadratojugals,  
187 as well as all of the elements of the orbitonasal and palatal regions are missing. The lateral  
188 margin of the left otic chamber and basioccipital region are damaged.

189

190 **Fig. 3. Basicranium MJSN CBE-0002.** Photographs and interpretative drawings in dorsal  
191 view (A-B), in ventral view (C-D) and in anterior view (E-F). Abbreviations: bo,  
192 basioccipital; bs, basisphenoid; caj, cavum acustico-jugulare; ccc, canalis caroticus cerebralis;  
193 cci, canalis caroticus internus; cm, condylus mandibularis; csa, canalis semicircularis anterior;  
194 cso, crista supraoccipitalis; csp, canalis semicircularis posterior; ct, cavum tympani; ds,  
195 dorsum sellae; exo, exoccipital; faccc, foramen anterius canalis carotici cerebralis; faccp,  
196 foramen anterius canalis carotici palatinum; fm, foramen magnum; fna, foramen nervi  
197 abducentis; fnh, foramen nervi hypoglossi; fnt, foramen nervi trigemini; fpccc, formamen  
198 posterius canalis carotici cerebralis; fpccp, foramen posterius canalis carotici palatinum; fst,  
199 foramen stapedio-temporale; op, opisthotic; pcl, processus clinoides; pi, processus  
200 interfenestralis; pp, processus paroccipitalis; pr, prootic; pt, pterygoid; pto, processus

201 trochlearis oticum; qu, quadrate; rst, recessus scalae tympani; sc, sulcus cavernosus; so,  
202 supraoccipital.

203

204 The poor preservation of the lateral margin of the quadrate prevents direct comparison of  
205 MJSN CBE-0002 with the type material of *Plesiochelys bigleri*, which is remarkable in  
206 having a deep cavum tympani facing posterolaterally and a quadrate forming the complete  
207 anterior margin of the antrum postoticum [11]. Similarly, the processus articularis of the  
208 quadrate is damaged ventrally and the shape of the condylus mandibularis cannot be  
209 described. The imperfectly preserved processus trochlearis oticum is modest in development,  
210 differing from the condition in *Plesiochelys etalloni*.

211 As in the type specimens of *Plesiochelys bigleri*, MJSN CBE-0002 has a shallow pterygoid  
212 fossa and a reduced posterior extension of the pterygoid over the cavum acustico-jugulare  
213 (processus interfenestralis of the opisthotic largely visible in ventral view). This new  
214 specimen nicely documents the contacts of the pterygoid in the basioccipital region and  
215 allows us to complete the original description of *Plesiochelys bigleri*. The presence of a  
216 pterygoid-basioccipital contact is confirmed, as is the absence of contact between the  
217 pterygoid and exoccipital. Only the anteroventral part of the processus interfenestralis of the  
218 opisthotic has a sutural contact with the dorsal surface of the pterygoid. The pterygoid forms  
219 the posteroventral part of the foramen nervi trigemini, which appears to be rounded and  
220 relatively wide, in contrast to the slit-like opening found in *Plesiochelys etalloni* [11,12].

221 As preserved, the canalis caroticus internus is open ventrally. In contrast to the type  
222 specimens of *Plesiochelys bigleri*, both the foramen posterius canalis carotici cerabralis and  
223 the foramen posterius canalis carotici palatinum are clearly visible in MJSN CBE-0002.  
224 Interestingly, the palatine branch does not branch off laterally from the cerebral branch as  
225 usual in plesiochelyids and most turtles. Instead, the split between the cerebral and palatine

226 branches occurs in a vertical plane and the foramen posterius canalis carotici palatinum is  
227 located anterior to the foramen posterius canalis carotici cerebralis (Fig. 4; see Discussion  
228 below). As far as we are aware of, this feature is unique to *Plesiochelys bigleri*.

229

230 **Fig. 4. Spatial relation and course of the canalis caroticus cerebralis and canalis**

231 **caroticus palatinum in MJSN CBE-0002 (A–D) and *Plesiochelys etalloni* (E–H).** Spatial

232 relation and course of the canalis caroticus cerebralis and canalis caroticus palatinum in

233 MJSN CBE-0002 (A–D) and *Plesiochelys etalloni* (E–H). Schematic 3D model of the

234 basisphenoid with the two branches of the carotid canal, in ventral view (the model is

235 semitransparent and schematic - the more complete half was mirrored) for *P. bigleri* (A) and

236 *P. etalloni* (F). Dashed line marks the position of the crosssection image. CT-cross section

237 image (transversal plane) of the split between the cerebral and palatal branches in *P. bigleri*

238 (B) and *P. etalloni* (E). Ventral view on the posterior foramina of the cerebral and palatine

239 canal in *P. bigleri* (C) and *P. etalloni* (G). Schematic 3D model of the two branches of the

240 carotid canal, in posterior view (the model is schematic - the more complete half was

241 mirrored) for *P. bigleri* (D) and *P. etalloni* (H). Abbreviations: bs, basisphenoid; ccc, canalis

242 carotici cerebralis; ccp, canalis carotici palatinum; cna, canalis nervi abducentis; fpccc,

243 foramen posterius canalis carotici cerebralis; fpccp, foramen posterius canalis carotici

244 palatinum.

245

246 The prootic is too poorly preserved to conclude on the presence or absence of an ossified

247 pila prootica (an autapomorphy of *Plesiochelys etalloni*; [12,24]). On the dorsal surface of the

248 otic chamber, there is a broad contact between the prootic and opisthotic, which prevents a

249 contact between the supraoccipital and quadrate. This differs from most specimens referred to

250 *Plesiochelys etalloni* [11]. As in the type material of *Plesiochelys bigleri*, the processus

251 paroccipitalis extends posterolaterally. The foramen externum nervi glossopharyngei is also  
252 located quite laterally at the base of the processus interfenestralis. Due to the presence of  
253 matrix in this area, it is difficult to confirm the presence of a ridge extending anteriorly from  
254 the base of the processus interfenestralis, as in other specimens referred to *Plesiochelys*  
255 *bigleri*. MJSN CBE-0002 confirms the complete enclosure of the fenestra perilymphatica by  
256 bone in this taxon.

257 The basisphenoid is poorly preserved in MJSN CBE-0002, but what is visible, is consistent  
258 with the original description of *Plesiochelys bigleri* [11]. The anterior foramen nervi  
259 abducentis opens ventrally and slightly anteromedially to the base of the slightly damaged  
260 processus clinoides, as in other plesiochelyids except *Plesiochelys etalloni*. The surface  
261 below the broken dorsum sellae appears to slope relatively gently anteriorly and presents a  
262 moderate midline tubercle. In the original description of *Plesiochelys bigleri*, Püntener et al.  
263 [11] stated that this surface is devoid of ridge or tubercle based on the morphology of the  
264 paratype specimen, but the cranium of the holotype specimen actually does have a moderate  
265 tubercle as in MJSN CBE-0002. The foramina anterius canalis carotici cerebri are  
266 separated by a broad bar of bone and open slightly posterior to the level of the foramina  
267 anterius canalis carotici palatinum.

268

## 269 Shell

270 MJSN CBE-0001 consists of several postcranial elements (see Material above), including  
271 an articulated fragment of carapace with the left costals 5–7 and part of the left peripherals 8  
272 and 9 (Fig. 5). This fragment is 116 mm in length and 175 mm in width. MJSN CBE-0003 is  
273 a near complete shell measuring 450 mm in length and 405 mm in width (Fig. 6; data  
274 availability: surface scan of the shell ). The plastron is 370 mm long and 320 mm wide.  
275 Superposing the articulated carapace fragment (MJSN CBE-0001) on top of the complete  
276 shell (MJSN CBE-0003) reveals that the two individuals were of the same size. MJSN CBE-

277 0003 is one of the most complete shells referred to *Plesiochelys bigleri* and the best specimen  
278 to illustrate the three-dimensional shape of the shell in this taxon (see Discussion below).

279

280 **Fig. 5. Carapace fragment MJSN CBE-0001 in dorsal view.** Abbreviations: co, costals; p,  
281 peripherals.

282

283 The outline of the carapace is roughly pentagonal with a moderately pointed posterior part  
284 (Fig. 6). The carapace is relatively low. Anteriorly, two parasagittal bulges, situated  
285 approximately at the medial third of the costals, frame a midline valley on the neurals (mostly  
286 visible at the level of neural 2 and costals 2). This part of the shell is not deformed, so this  
287 feature is probably natural. The general characteristics of the carapace of MJSN CBE-0003  
288 agree fairly well with the description of Püntener et al. [11]: wider than long, trapezoidal  
289 nuchal, reduced nuchal notch, neural 1 oval in shape, neurals 2–6 elongated hexagons with  
290 shorter sides anteriorly, neurals 7 and 8 reduced in size (but preventing any midline contact  
291 between costals), roughly trapezoidal intermediate element tapering anteriorly, wide and  
292 trapezoidal suprapyrgals, eight pairs of costals and 11 pairs of peripherals, standard pattern of  
293 carapacial scutes (cervical region poorly preserved). The length-width ratio of costal 4  
294 corresponds to what is known in *Plesiochelys etalloni* and other specimens referred to  
295 *Plesiochelys bigleri* (see [15]).

296

297 **Fig. 6. Shell MJSN CBE-0002.** A-B: photograph and interpretative drawing of the carapace;  
298 C-D: photograph and interpretative drawing of the plastron. Abbreviations: AB, abdominal  
299 scale; AN, anal scale; co, costal; EG, extragular scale; ento, entoplastron; epi, epiplastron;  
300 FEM, femoral scale; GU, gular scale; HUM, humeral scale; hyo, hyoplastron; hypo,  
301 hypoplastron; IF, inframarginal scale; M, marginal scale; n, neural; nu, nuchal; p, peripheral;

302 PL, pleural scale; py, pygal; sp, suprapygal; V, vertebral scale; xi, xiphiplastron;\*,  
303 intermediate element.

304

305 *Plesiochelys bigleri* and *Plesiochelys etalloni* can be differentiated based on neural bone  
306 thickness [11]. Unfortunately, this parameter cannot be precisely measured on the new  
307 material from Glovelier. Rough measurements were obtained by estimating the thickness of  
308 neurals 2–5 through fractures in or close to the neural elements with bands of paper. The  
309 resulting mean thickness and mean length/thickness ratio (Table 2; Fig. 7) are congruent with  
310 *Plesiochelys bigleri* and clearly out of the range for *Plesiochelys etalloni* (see [11]).

311

312 **Fig. 7. Mean neural length/thickness scatter plot for MJSN CBE-0002 (brown) and**  
313 **selected specimens of *Plesiochelys bigleri* (yellow) and *Plesiochelys etalloni* (blue).** Graph  
314 modified after Püntener et al. [11]. Mean measurements of the new specimen MJSN CBE-  
315 0002 are plotted with the estimated range of error, which resulted from measurement  
316 limitations (see text).

317

318 The plastron of MJSN CBE-0003 presents an oval central plastral fontanelle. The central  
319 part of the plastron is moderately concave, which may indicate a male individual (by analogy  
320 with recent turtle species). The outline of the anterior plastral lobe is quadrangular, as typical  
321 in many specimens of *Plesiochelys bigleri* [11]. Epiplastral bulbs are absent. The entoplastron  
322 is rounded and rather small in comparison to most other known specimens of *Plesiochelys*  
323 *etalloni* and *Plesiochelys bigleri*, but an important variability in the shape and size of this  
324 element has been reported for these taxa [11,15]. The hyoplastron is very slightly wider than  
325 long. This should be noted, although other specimens referred to *Plesiochelys bigleri* have  
326 hyoplastra about as wide as long [11]. The xiphiplastra are rather long, as in many specimens

327 of *Plesiochelys bigleri*, and noticeably angular posteriorly. The pattern of plastral scutes is  
328 conform to the original description [11].

329

330 **Tab. 2:** Measurements of the neural elements of MJSN CBE-0003 and selected specimens of  
331 *Plesiochelys bigleri* and *Plesiochelys etalloni*. See Püntener et al. [11] for original data on *P.*  
332 *bigleri* and *P. etalloni*.

| Specimens                | Mean neural 2–5<br>length [mm] | Mean neural 2–5<br>thickness [mm] | Length/thickness<br>ratio |
|--------------------------|--------------------------------|-----------------------------------|---------------------------|
| MJSN CBE-0003            | 56.00                          | 9.70*                             | 5.80                      |
| <i>P. bigleri</i> (n=25) | 45.27–65.20                    | 9.61–13.77                        | 4.00–5.62                 |
| <i>P. etalloni</i> (n=8) | 48.70–60.21                    | 12.82–17.76                       | 3.10–3.91                 |

333 \*based on ten rough measurements (see text).

334

### 335 Postcranial elements

336 Of the right scapula (MJSN CBE-0001), only the dorsal scapular process is preserved. This  
337 process was crushed and broken in several places during fossilization (Fig. 8). As preserved,  
338 the scapular process is strongly arched and concave medially, but this is probably not its  
339 original shape. The scapular angle cannot be precisely measured, but can be estimated to be  
340 similar to what is known in *Plesiochelys* spp. [11,25].

341

342 **Fig. 8. Postcranial material MJSN CBE-0001.** Left femur in dorsal (A) and posterior (B)  
343 views; scapula in medial (C) and lateral (D) views; cervical vertebra in dorsal view (E);  
344 caudal vertebra in ventral view (F).

345

346 The femur is 100 mm long and relatively complete. Both trochanters and condyles are  
347 partly broken and the femoral head is damaged laterally. It was found in close association  
348 with the near complete shell MJSN CBE-0003. The morphology of the femur matches fairly  
349 well the description of Püntener et al. [11] and in that sense corresponds to what is known in  
350 other plesiochelyids, except *Tropidemys langii* [9].

351 A partial cervical vertebra was found associated with the near complete shell MJSN CBE-  
352 0003. It consists only of the neural arch, while the right pre- and postzygapophyses are  
353 missing. The posterior part of the neural arch is higher than the anterior part. The neural spine  
354 consists of a low longitudinal ridge. The pre- and postzygapophyses are widely spaced and  
355 their articular surface faces dorsomedially and ventrolaterally, respectively. This is consistent  
356 with what is known in other plesiochelyids and thalassemydids [11].

357 A small caudal vertebra centrum (12 mm long) was found associated with the shell MJSN  
358 CBE-0003. Interestingly, this centrum is amphicoelous with the two articular surfaces  
359 moderately concave. Bräm [25] described the caudal centra of *Plesiochelys etalloni* as  
360 procoelous, but this observation could not be reproduced recently [11]. The articular surfaces  
361 are oval in outline (slightly compressed dorsoventrally). There is a low, but robust ventral  
362 keel. A small nerve foramen is present just left of the ventral keel approximately midway  
363 along the centrum. The transverse process is apparently robust and located anteriorly along  
364 the centrum, but this part of the vertebra is poorly preserved.

365

## 366 Discussion

### 367 Alpha taxonomy

368 The new material from Glovelier can be confidently referred to *Plesiochelys bigleri* based  
369 on the following combination of characteristics: shallow pterygoid fossa, reduced processus



370 trochlearis oticum, more rounded foramen nervi trigemini, anterior foramen nervi abducentis  
371 opening anteromedial to the base of the processus clinoides, foramen anterius canalis carotici  
372 cerebralis located more anteriorly relative to the level of the dorsum sellae, superficial canalis  
373 caroticus internus (remaining possibly open ventrally), reduced posterior extension of the  
374 pterygoid over the cavum acustico-jugulare, processus paroccipitalis of the opisthotic  
375 extending posterolaterally, reduced neural bone thickness, epiplastral bulbs absent, and  
376 anterior plastral lobe quadrangular in outline (see [1,11]).

377

### 378 *New data on Plesiochelys bigleri*

379 *Plesiochelys bigleri* was initially described based on a collection of 41 shells and two  
380 crania from the Kimmeridgian of the Porrentruy region, NW Switzerland [11]. The  
381 morphology of this taxon is therefore relatively well known. However, the new material from  
382 Glovelier described herein provided some additional information, which are summed up and  
383 discussed below.

384 The basicranium MJSN CBE-0002 provides unambiguous information on the contacts of  
385 the pterygoid with posterior basicranial elements. The pterygoid has a clear contact with the  
386 basioccipital, but lacks a contact with the exoccipital. The absence of a pterygoid-exoccipital  
387 contact is a difference with *Plesiochelys etalloni*, but the observation of this character is often  
388 difficult [12]. MJSN CBE-0002 also confirms the complete enclosure of the fenestra  
389 perilymphatica in *Plesiochelys bigleri*, but it is unclear whether the exoccipital or the  
390 basioccipital are responsible for the ventromedial closure of the fenestra. Finally, the new  
391 basicranium from Glovelier documents a new configuration of the split between the cerebral  
392 and palatine branches of the internal carotid artery (see below).

393 Although *Plesiochelys bigleri* is known by scores of shells, most were variably deformed  
394 and crushed during fossilization. A similar situation exists for shells of *Plesiochelys etalloni*  
395 from Solothurn and Porrentruy, the two most productive localities. However, the holotype of

396 *P. etalloni* [14] and some specimens from Solothurn (e.g., NMS 8516, NMS 8579, NMS  
397 8727, NMS 9173) suggest a low, evenly domed shell in this species. Most shells of  
398 *Plesiochelys bigleri* from the Porrentruy region were found in a semi-disarticulated state.  
399 Although attempts were made to estimate the 3D shape of the shell in this taxon by mounting  
400 the disarticulated elements on moldable sand [11], the reconstructions ranged from relatively  
401 flat to highly domed depending on the amount of postmortem deformation variably affecting  
402 the disarticulated shell bones. MJSN CBE-0003 therefore represents the first specimen to  
403 document the natural shell shape in *Plesiochelys bigleri*. The shell is relatively low, as in *P.*  
404 *etalloni*, but the two parasagittal bulges on the anterior costals are possibly a new character of  
405 *P. bigleri* (see data availability: surface scan of the shell).

406 Finally, the new material from Glovelier slightly extends the geographical and  
407 stratigraphical range of the species *Plesiochelys bigleri*. Most of the specimens known to date  
408 originate from the upper Kimmeridgian Lower *Virgula* Marls (Eudoxus ammonite zone), with  
409 only two incomplete shells found in the middle and upper parts of the lower Kimmeridgian  
410 Banné Marls (Cymodoce ammonite zone; see [11]). The new material from Glovelier was  
411 found close to the base of the Banné Marls and unambiguously confirms the occurrence of  
412 this species in this layer. This is also the first time the presence of the species is documented  
413 outside of the Porrentruy region.

414

#### 415 **Carotid circulation**

416 In most pan-cryptodires, the palatine branch of the internal carotid artery splits off laterally  
417 from the cerebral branch (e.g., [18,26]). This split usually occurs in the basisphenoid and  
418 pterygoid bones, and can therefore be documented in fossil turtles, though this may require  
419 special investigation tools (e.g., computed tomography). In some thalassochelydians, the  
420 canalis caroticus internus is superficial and is either unfloored or damaged so that the split  
421 between the cerebral and palatine branches of the internal carotid artery is apparent in ventral

422 view. This is notably the case in most specimens referred to *Plesiochelys etalloni* [12]. In all  
423 specimens where the split is apparent externally, the palatine branch splits off laterally from  
424 the cerebral branch. Based on preliminary investigations, this is also the condition in the  
425 thalassochelydians *Jurassichelon oleronensis*, *Plesiochelys planiceps* and *Solnhofia parsonsi*.  
426 To our knowledge, MJSN CBE-0002 is unique among thalassochelydians in that the split  
427 between the cerebral and palatine branches occurs in a vertical plane. The palatine branch  
428 splits off ventrally from the carotid and travels ventral to the cerebral branch before entering  
429 the foramen posterius canalis carotici palatinum.

430 The skulls MJSN CBE-0002, MJSN TCH007-252 (holotype of *Plesiochelys bigleri*), and  
431 NMS 40870 (*Plesiochelys etalloni*) were CT-scanned and segmented for the purpose of this  
432 study (Supplementary material: S 1 & 2; data availability: isolated bones ). Unfortunately, the  
433 canalis caroticus palatinum could not be reconstructed in MJSN TCH007-252. The paths of  
434 the canalis caroticus cerebrialis and canalis caroticus palatinum were reconstructed for the two  
435 other crania (Fig. 4). In NMS 40870, the palatine branch splits off laterally and travels  
436 forward in the pterygoid while the cerebral branch continues dorsomedially through the  
437 basisphenoid. In MJSN CBE-0002, the palatine branch splits off ventrally and travels below  
438 the cerebral branch for a time. The two configurations are clearly different and confirm  
439 external observations.

440 As far as we know, the aforementioned configuration in MJSN CBE-0002 is unique in  
441 thalassochelydians, and possibly in pan-cryptodires, but further investigation is necessary.  
442 This feature can be added to the list of characteristics that differentiate *Plesiochelys bigleri*  
443 from *Plesiochelys etalloni*.

444

## 445 Conclusion

446 The newly obtained material from Glovelier can be confidently referred to *Plesiochelys*  
447 *bigleri* and slightly extends the geographical and stratigraphical range of the species. The  
448 well-preserved cranium fragment (MJSN CBE-0002) reveals several morphological features  
449 and bone contacts that were not very clear or could not at all be observed in the type material  
450 of *Plesiochelys bigleri*. Especially noteworthy, is the spatial orientation of the split between  
451 the cerebral and palatine branches of the carotid artery. In thalassochelydians, this split occurs  
452 in a horizontal plane, while in this specimen, the split is oriented on a vertical plane instead.  
453 This condition seems to be unique for this clade. MJSN CBE-0003 is the first specimen to  
454 document the 3D shape of the shell of *Plesiochelys bigleri*. This rather low shell shows two  
455 parasagittal bulges on the anterior costals that may be considered as a new character of *P.*  
456 *bigleri*.

457

458

## 459 Acknowledgements

460 We would like to thank Bernhard Hostettler (NMBE) for the help during the excavation of the  
461 material in 2014, for signaling the following material in 2016 and Ursula Menkveld–Gfeller  
462 (NMBE) for the access to the preparation lab at the Naturhistorische Museum in Bern.  
463 Likewise, we are grateful to Renaud Roch (MJSN) for the preparation of most of the material  
464 studied herein. Serjoscha Evers kindly provided access to segmented 3D models of the  
465 holotypes of *Plesiochelys planiceps* and *Solnhofia parsonsi*.

466

## 467 References

- 468 1. Anquetin J, Püntener C, Joyce WG. A review of the fossil record of turtles of the clade  
469 *Thalassochelydia*. Bulletin of the Peabody Museum of Natural History. 2017;58: 317–  
470 369.
- 471 2. Dollo L. Première note sur les chéloniens du Bruxellien (Éocène moyen) de la Belgique.  
472 Bulletin du Musée Royal d’Histoire Naturelle de Belgique. 1886;4: 75–96.
- 473 3. Baur G. Osteologische Notizen über Reptilien (Fortsetzung II). Zoologischer Anzeiger.  
474 1888;11: 417–424.
- 475 4. Zittel KA. Handbuch der Palaeontologie, Section 1: Palaeozoologie, Volume 3,  
476 Vertebrata, Shipment 3: Reptilia. München: R. Oldenbourg; 1889.
- 477 5. Marty D, Hug WA. Le Kimméridgien en Ajoie (Mésozoïque) : premiers résultats de  
478 fouilles et de recherches paléontologique sur le tracé de la Transjurane (A16). Actes de  
479 la Société jurassienne d’émulation. 2003;2003: 27–44.
- 480 6. Comment G, Ayer J, Becker D. Deux nouveaux membres lithostratigraphiques de la  
481 Formation de Reuchenette (Kimméridgien, Ajoie, Jura suisse) - Nouvelles données  
482 géologiques et paléontologiques acquises dans le cadres de la construction de l’autoroute  
483 A16 (Transjurane). Swiss Bulletin für angewandte Geologie. 2011;16: 3–24.
- 484 7. Comment G, Lefort A, Koppka J, Hantzpergue P. Le Kimméridgien d’Ajoie (Jura,  
485 Suisse) : lithostratigraphie et biostratigraphie de la Formation de Reuchenette. Revue de  
486 Paléobiologie. 2015;34: 161–194. doi:10.5281/zenodo.34341
- 487 8. Püntener C, Anquetin J, Billon-Bruyat J-P. Vertébrés mésozoïques – Tortues.  
488 Porrentruy: Office de la culture, Paléontologie A16; 2017.

- 489 9. Püntener C, Billon-Bruyat J-P, Bocat L, Berger J-P, Joyce WG. Taxonomy and  
490 phylogeny of the turtle *Tropidemys langii* Rüttimeyer, 1873 based on new specimens  
491 from the Kimmeridgian of the Swiss Jura Mountains. Journal of Vertebrate  
492 Paleontology. 2014;34: 353–374.
- 493 10. Püntener C, Anquetin J, Billon-Bruyat J-P. *Thalassemys bruntrutana* n. sp., a new  
494 coastal marine turtle from the Late Jurassic of Porrentruy (Switzerland), and the  
495 paleobiogeography of the Thalassemydidae. PeerJ. 2015;3: e1282.  
496 doi:10.7717/peerj.1282
- 497 11. Püntener C, Anquetin J, Billon-Bruyat J-P. The comparative osteology of *Plesiochelys*  
498 *bigleri* n. sp., a new coastal marine turtle from the Late Jurassic of Porrentruy  
499 (Switzerland). PeerJ. 2017;5: e3482. doi:10.7717/peerj.3482
- 500 12. Anquetin J, Püntener C, Billon-Bruyat J-P. *Portlandemys gracilis* n. sp., a new coastal  
501 marine turtle from the Late Jurassic of Porrentruy (Switzerland) and a reconsideration of  
502 plesiochelyid cranial anatomy. PLOS ONE. 2015;10: e0129193.  
503 doi:10.1371/journal.pone.0129193
- 504 13. Meyer CA. Depositional environment and paleoecology of the Solothurn Turtle  
505 Limestone (Kimmeridgian, Northern Switzerland). Geobios. 1994;16: 227–236.
- 506 14. Anquetin J, Deschamps S, Claude J. The rediscovery and redescription of the holotype  
507 of the Late Jurassic turtle *Plesiochelys etalloni*. PeerJ. 2014;2: e258.  
508 doi:10.7717/peerj.258
- 509 15. Anquetin J, Püntener C, Billon-Bruyat J-P. A taxonomic review of the Late Jurassic  
510 eucryptodiran turtles from the Jura Mountains (Switzerland and France). PeerJ. 2014;2:  
511 e369. doi:10.7717/peerj.369

- 512 16. Anquetin J, Chapman SD. First report of *Plesiochelys etalloni* and *Tropidemys langii*  
513 from the Late Jurassic of the UK and the palaeobiogeography of plesiochelyid turtles.  
514 Royal Society Open Science. 2016;3: 150470. doi:10.1098/rsos.150470
- 515 17. Gaffney ES. An illustrated glossary of turtle skull nomenclature. American Museum  
516 Novitates. 1972;2486: 1–33.
- 517 18. Gaffney ES. Comparative cranial morphology of Recent and fossil turtles. Bulletin of the  
518 American Museum of Natural History. 1979;164: 65–376.
- 519 19. Rabi M, Zhou C-F, Wings O, Ge S, Joyce WG. A new xinjiangchelyid turtle from the  
520 Middle Jurassic of Xinjiang, China and the evolution of the basipterygoid process in  
521 Mesozoic turtles. BMC Evolutionary Biology. 2013;13: 203.
- 522 20. Zangerl R. The turtle shell. In: Gans C, Bellairs AA, Parsons TS, editors. Biology of the  
523 Reptilia Volume 1, Morphology A. London: Academic Press; 1969. pp. 311–339.
- 524 21. Batsch AJGC. Versuch einer Anleitung, zur Kenntniß und Geschichte der Thiere und  
525 Mineralien. Jena: Akademische Buchhandlung; 1788.
- 526 22. Joyce WG, Parham JF, Gauthier JA. Developing a protocol for the conversion of rank-  
527 based taxon names to phylogenetically defined clade names, as exemplified by turtles.  
528 Journal of Paleontology. 2004;78: 989–1013.
- 529 23. Rüttimeyer L. Die fossilen Schildkröten von Solothurn und der übrigen Juraformation.  
530 Neue Denkschrift der allgemeinen schweizerischen naturforschenden Gesellschaft.  
531 1873;25: 1–185.
- 532 24. Gaffney ES. Cranial morphology of the European Jurassic turtles *Portlandemys* and  
533 *Plesiochelys*. Bulletin of the American Museum of Natural History. 1976;157: 487–544.

- 534 25. Bräm H. Die Schildkröten aus dem oberen Jura (Malm) der Gegend von Solothurn.  
535 Schweizerische Paläontologische Abhandlungen. 1965;83: 1–190.
- 536 26. Albrecht PW. The cranial arteries of turtles and their evolutionary significance. Journal  
537 of Morphology. 1976;149: 159–182.
- 538



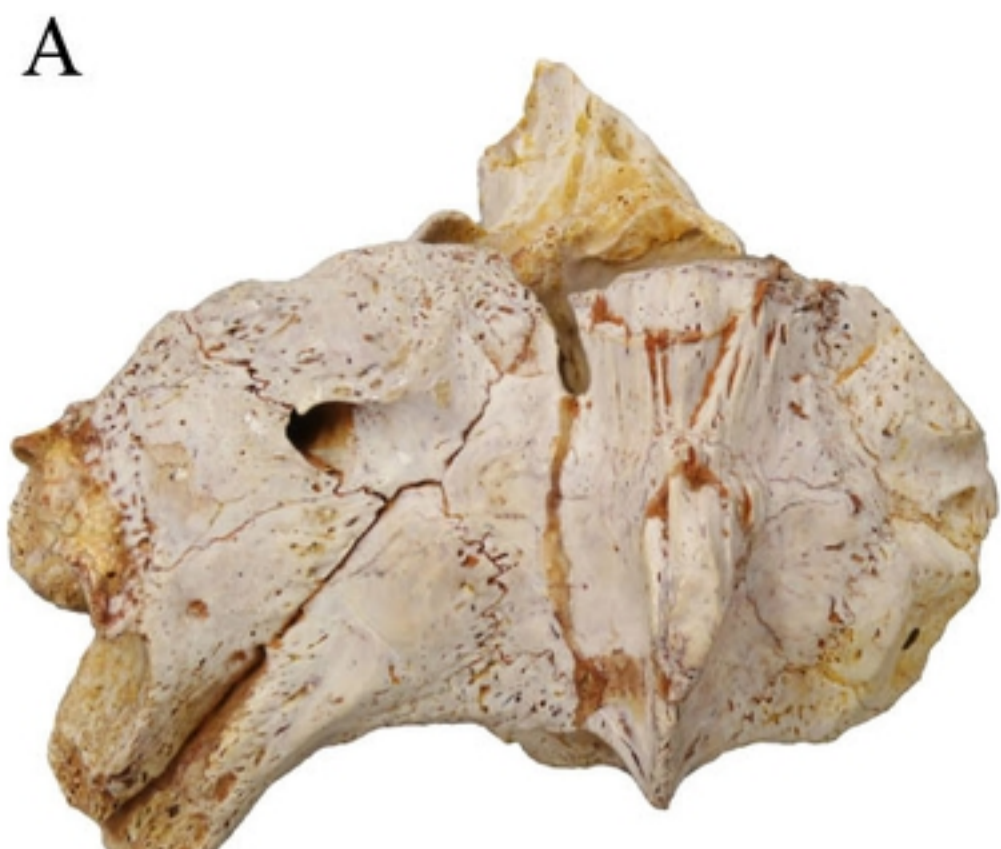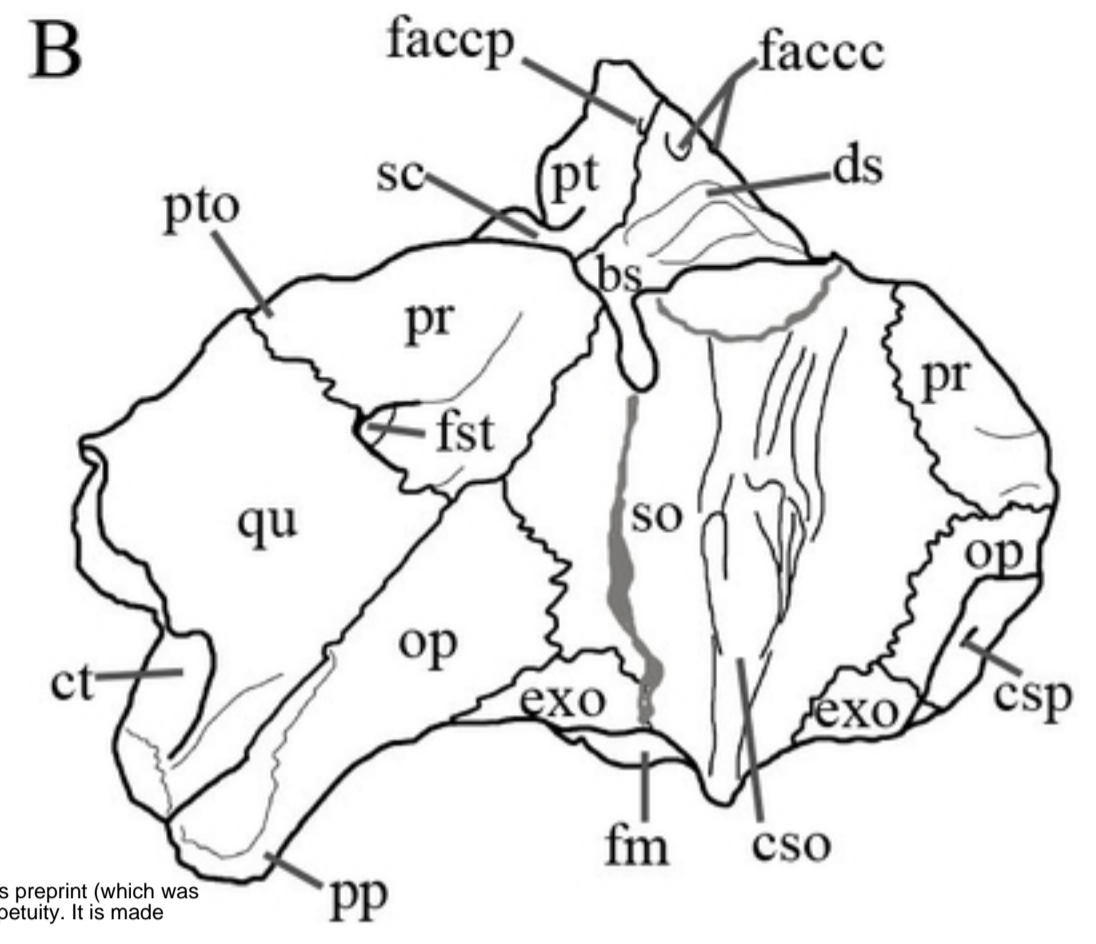

bioRxiv preprint doi: <https://doi.org/10.1101/582700>; this version posted March 19, 2019. The copyright holder for this preprint (which was not certified by peer review) is the author/funder, who has granted bioRxiv a license to display the preprint in perpetuity. It is made available under aCC-BY 4.0 International license.

1 cm

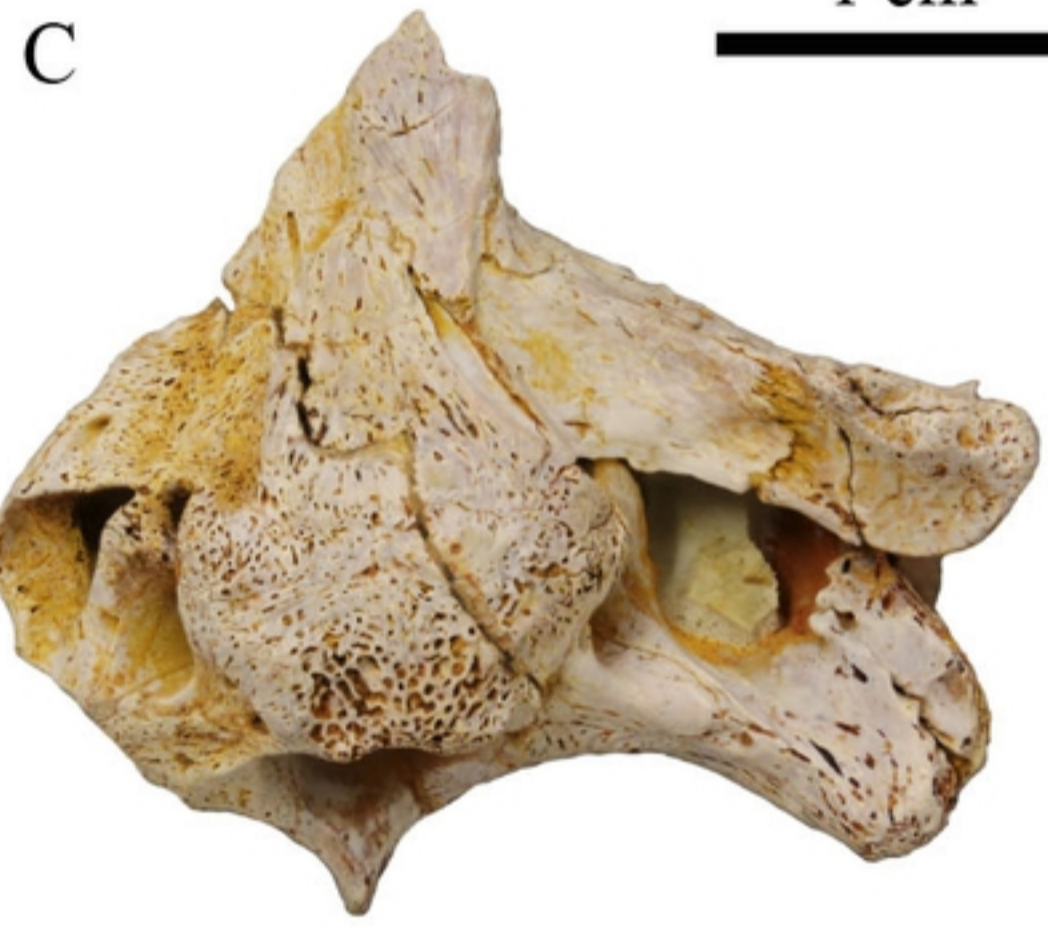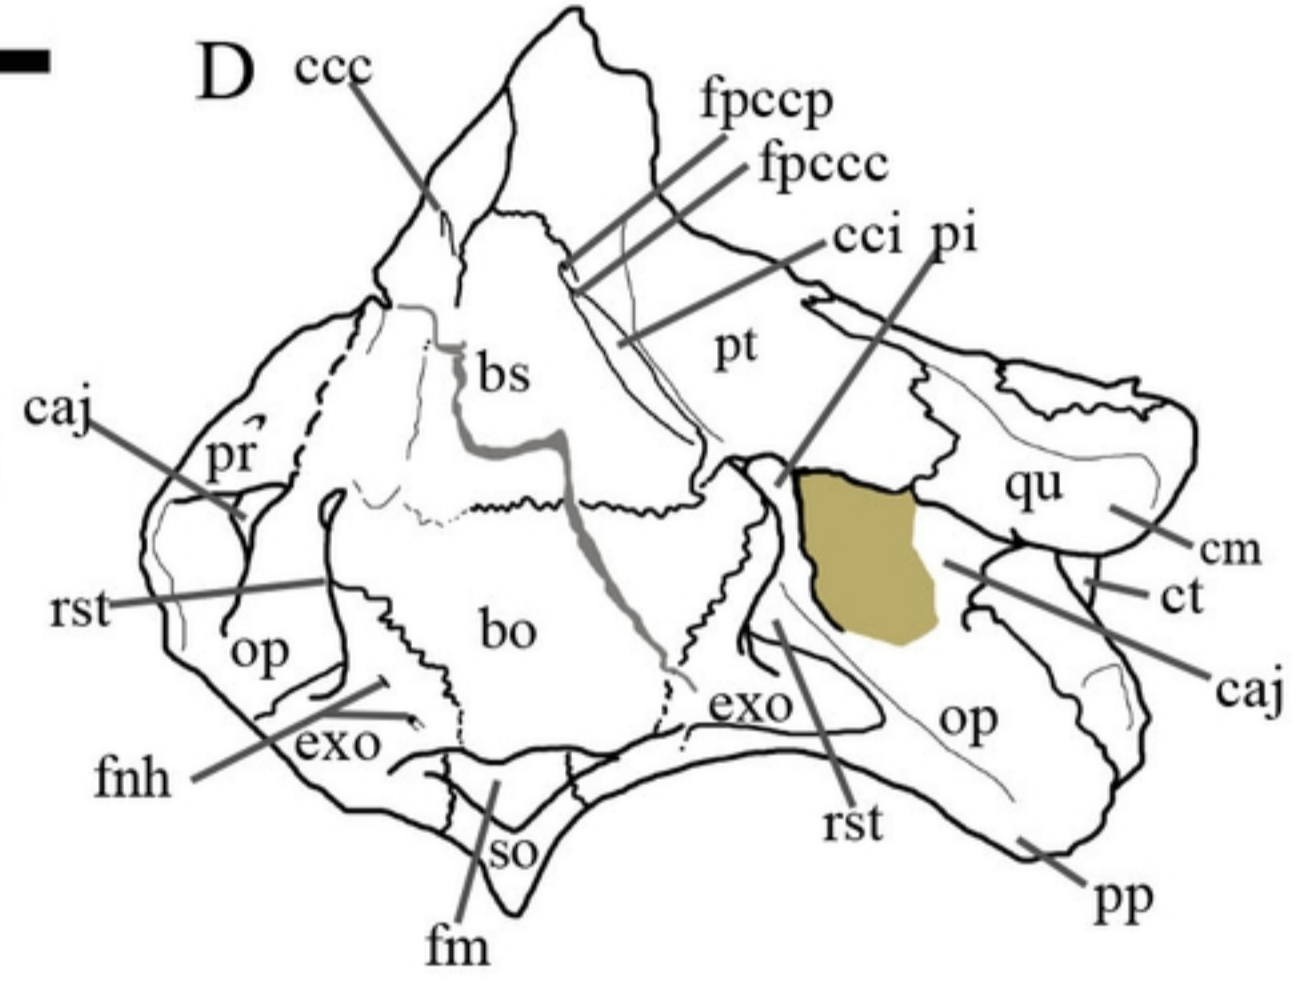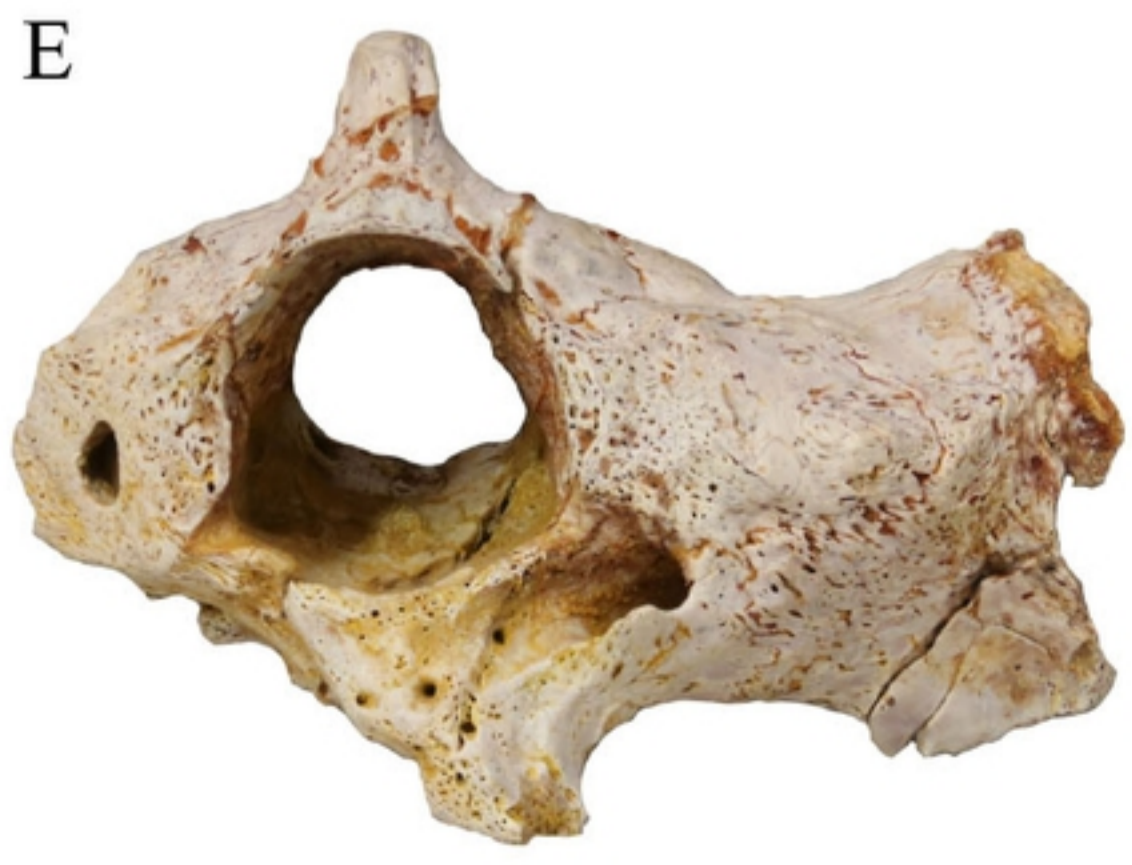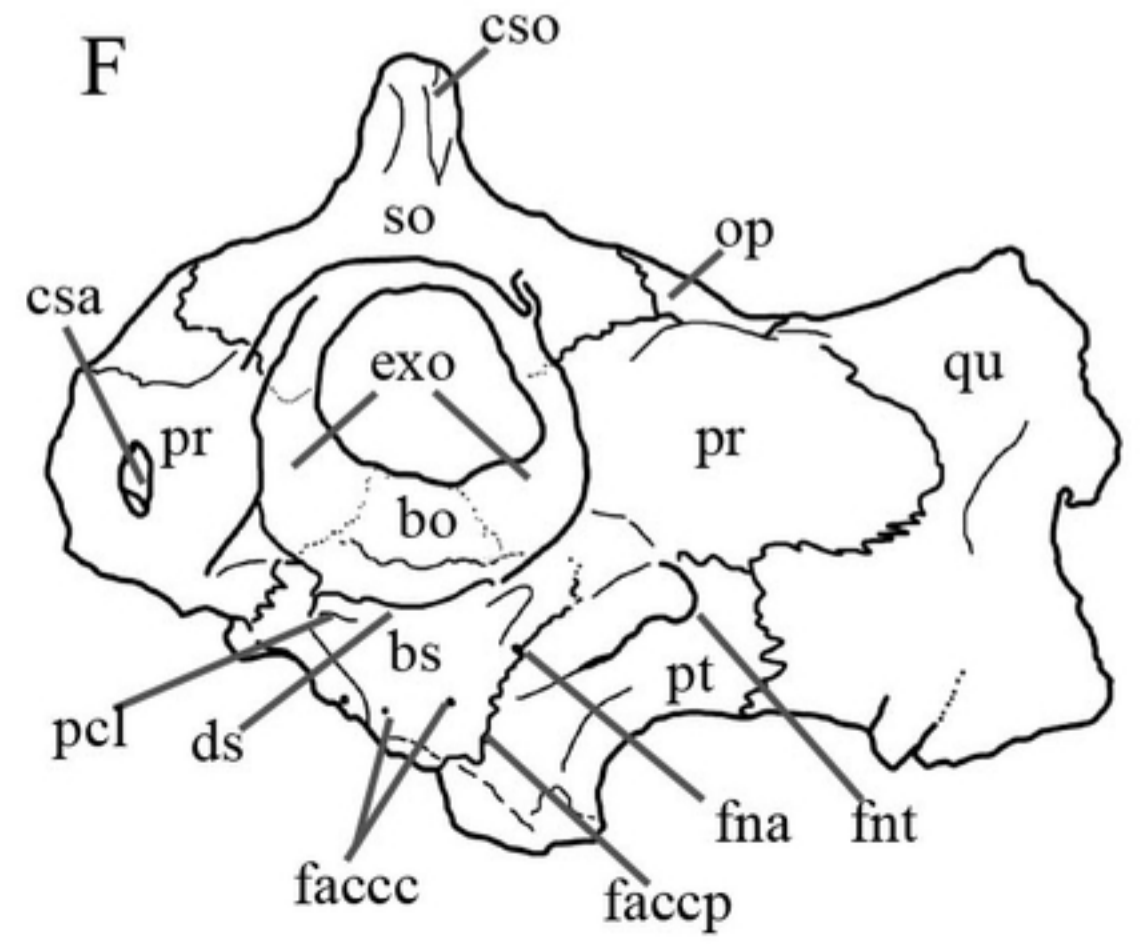

Figure



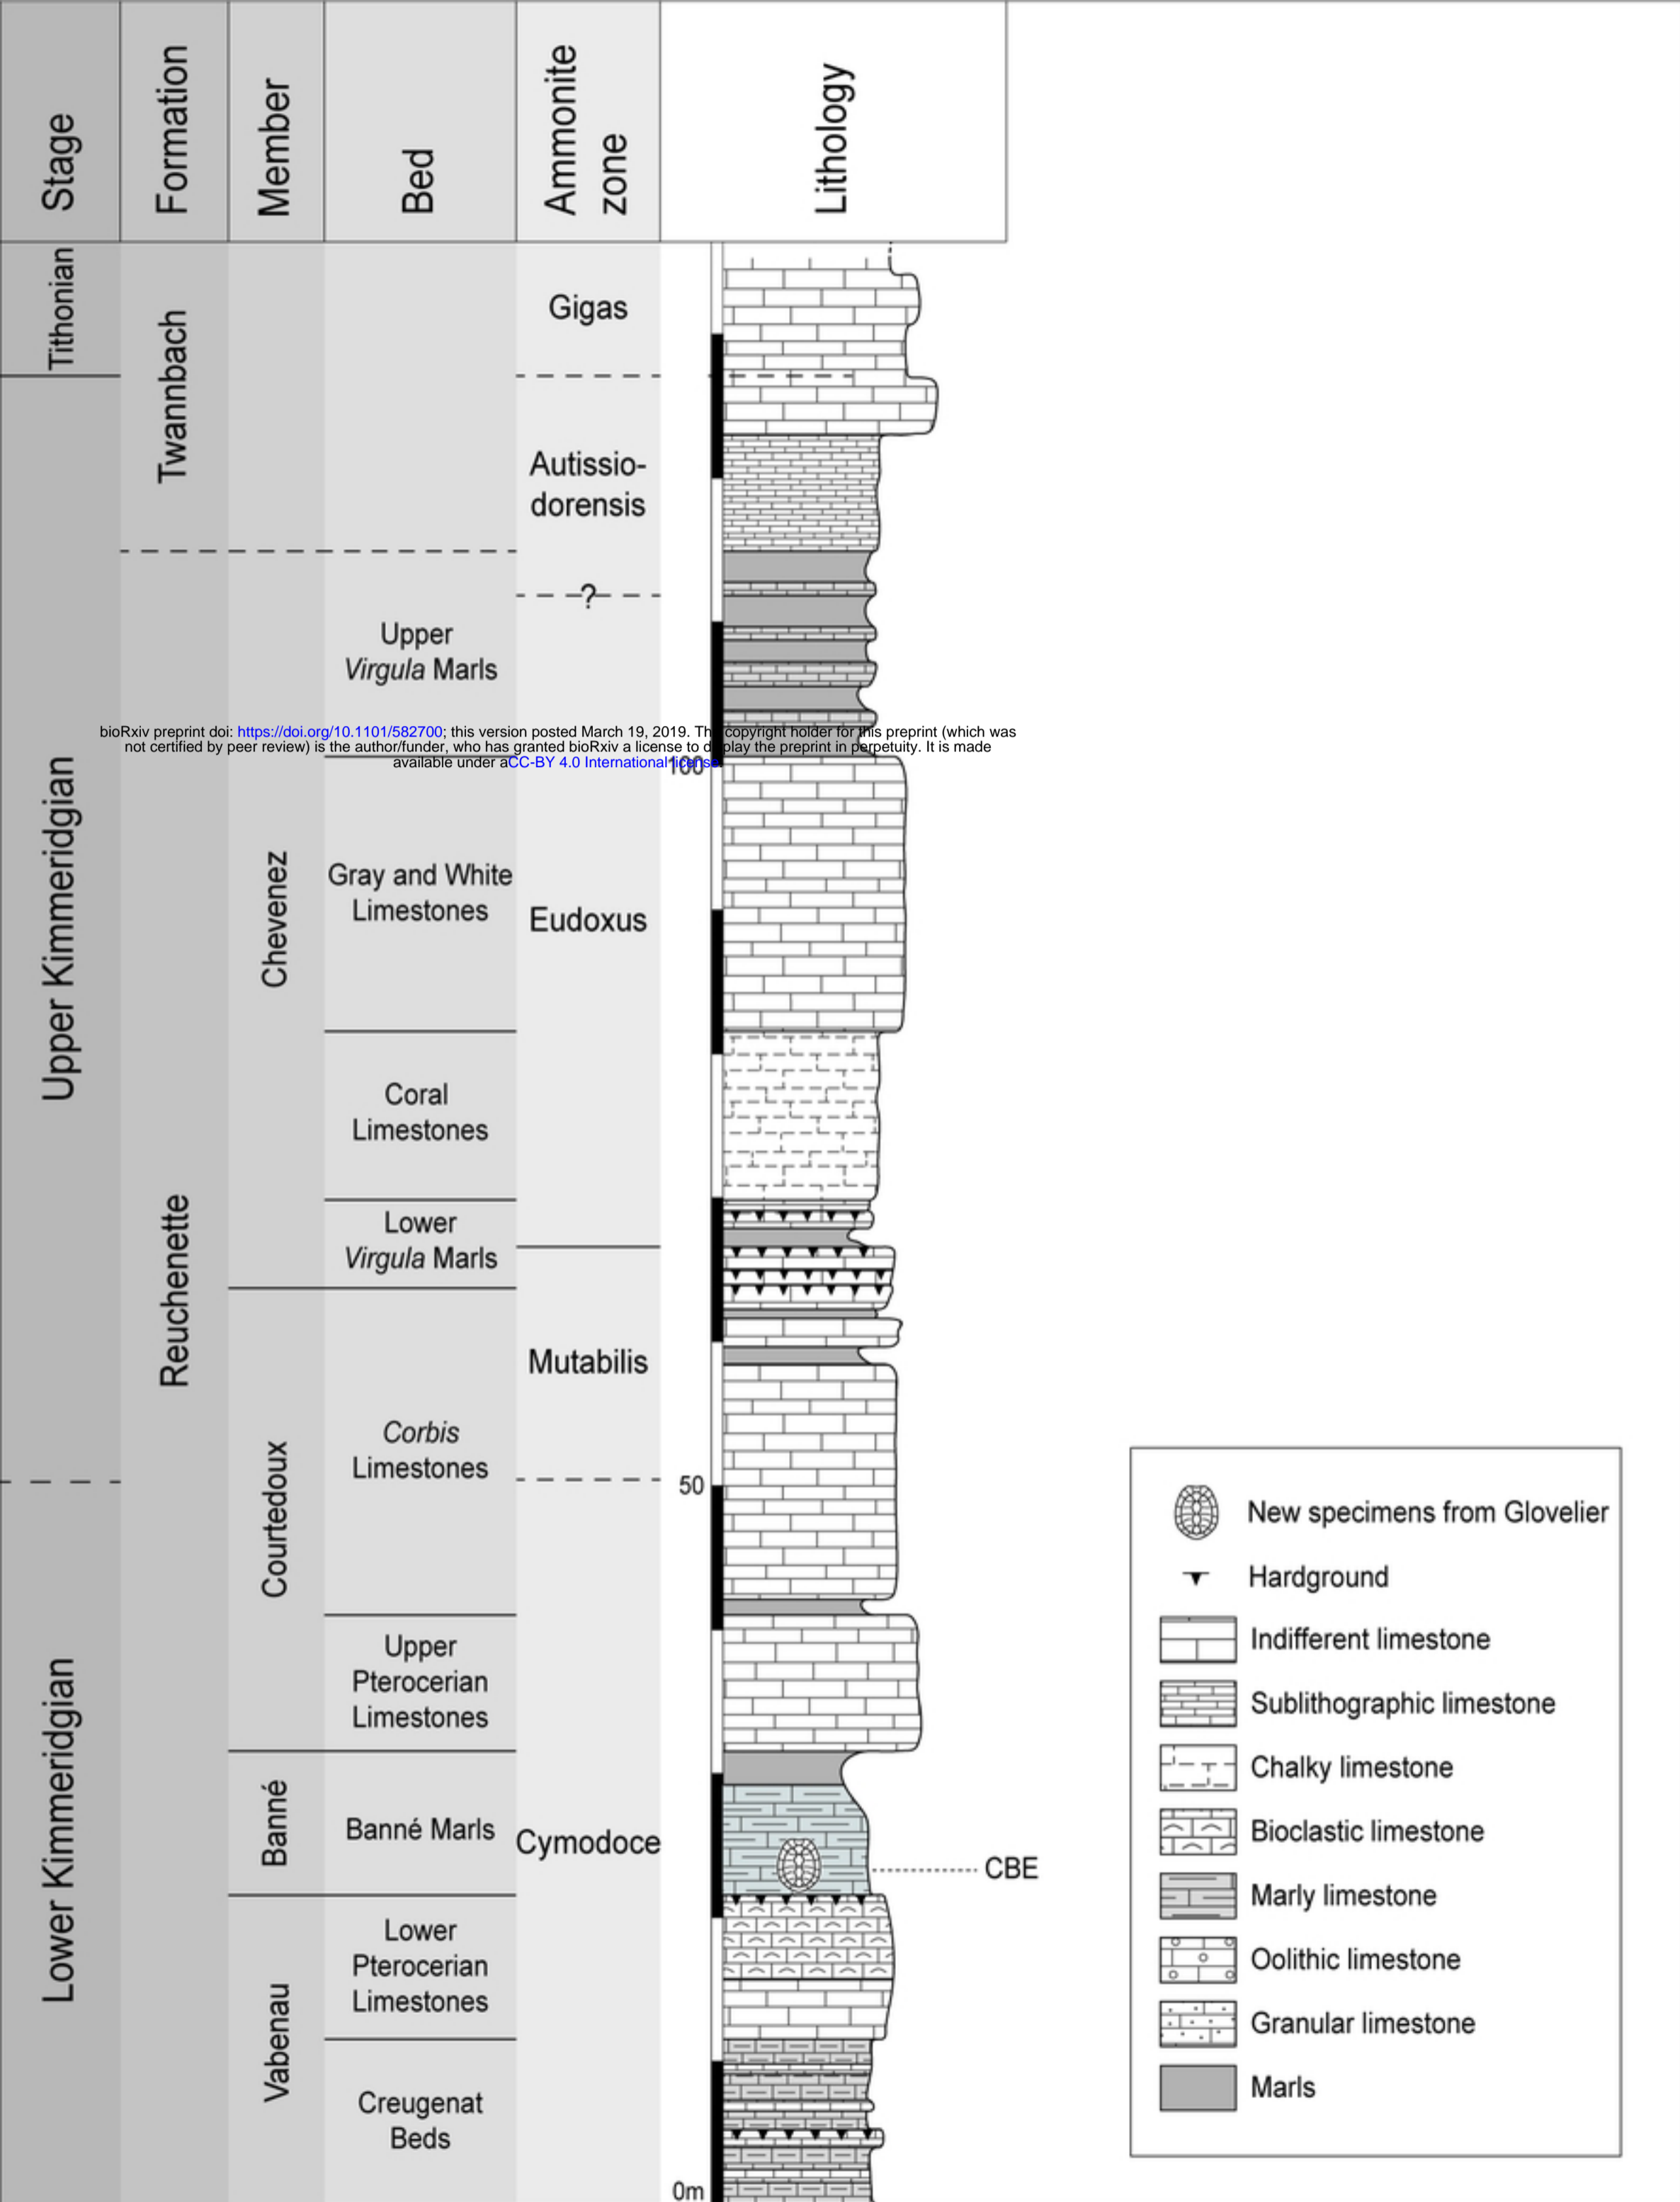

Figure

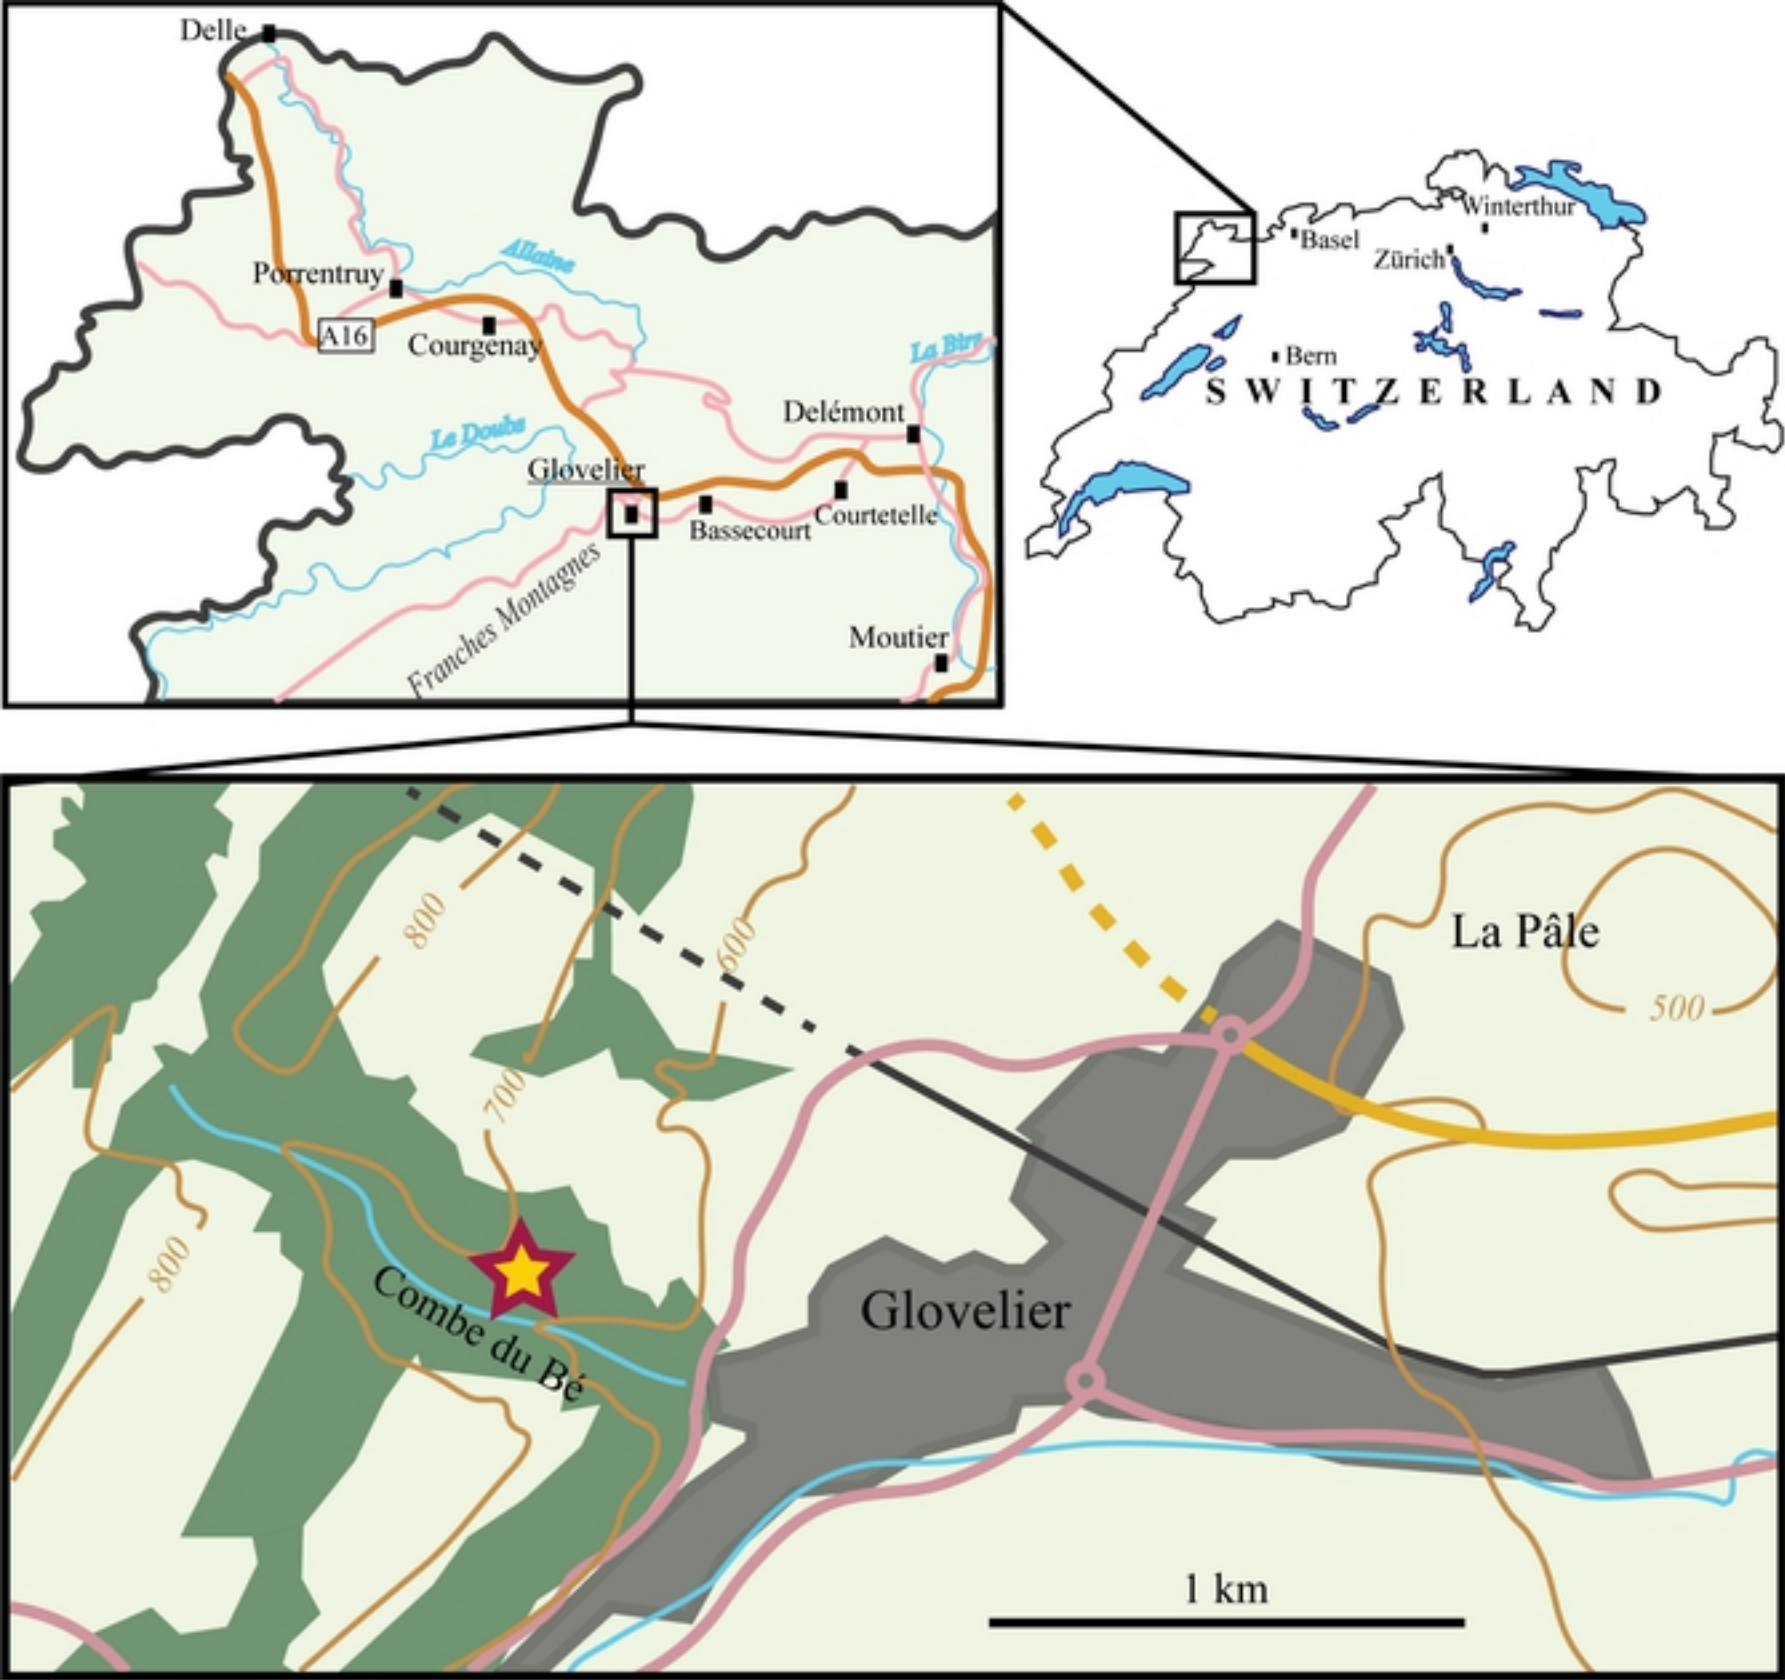

Figure

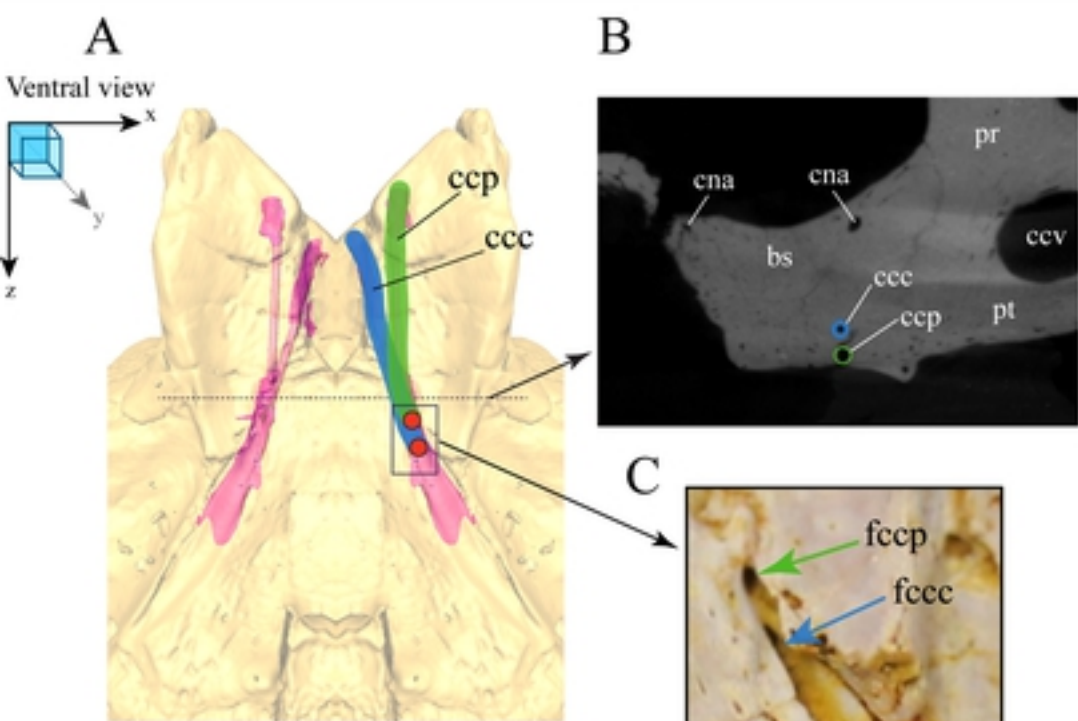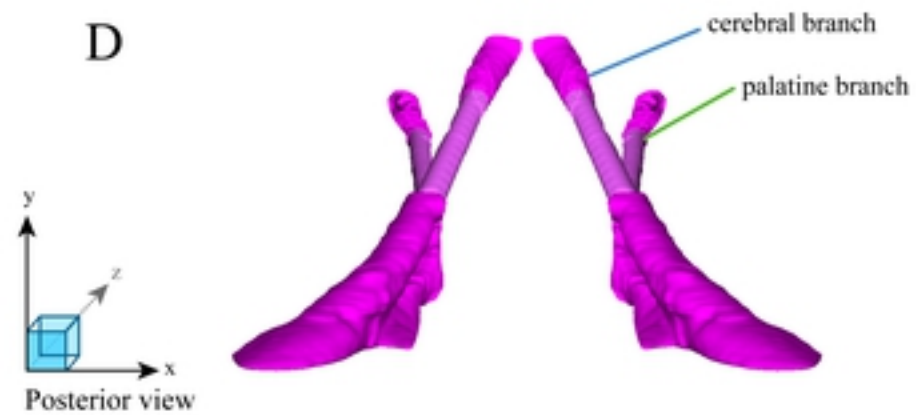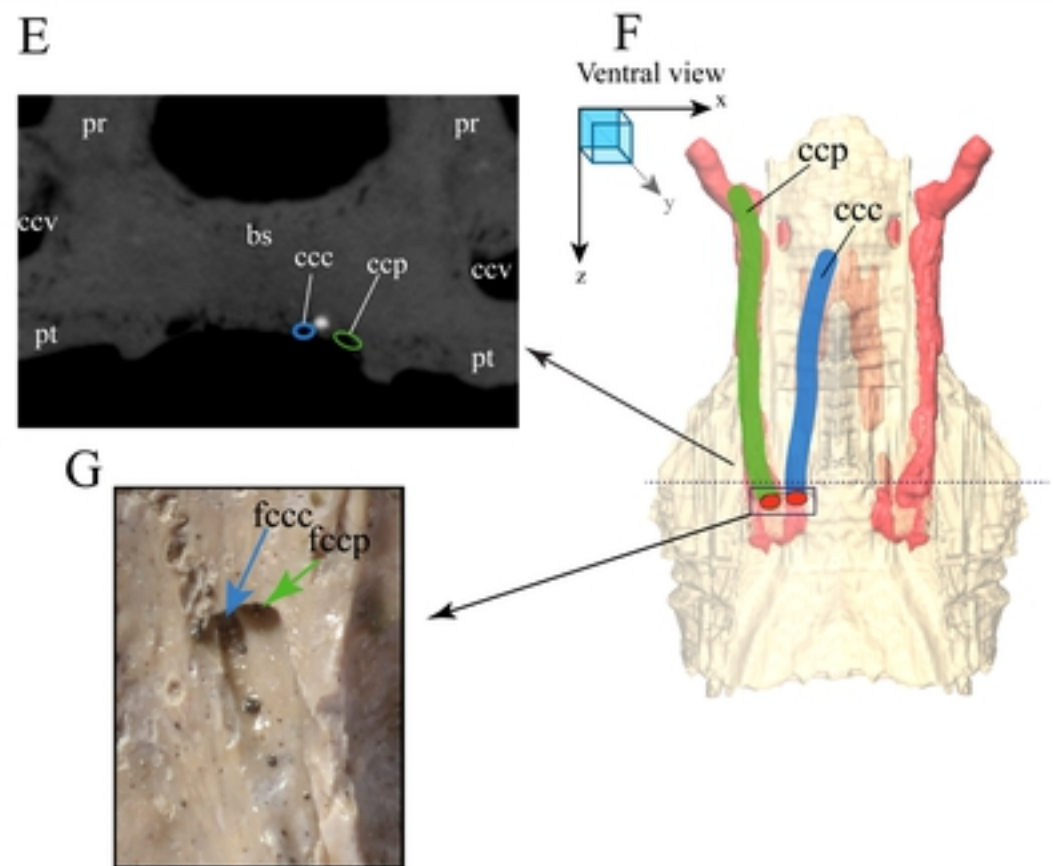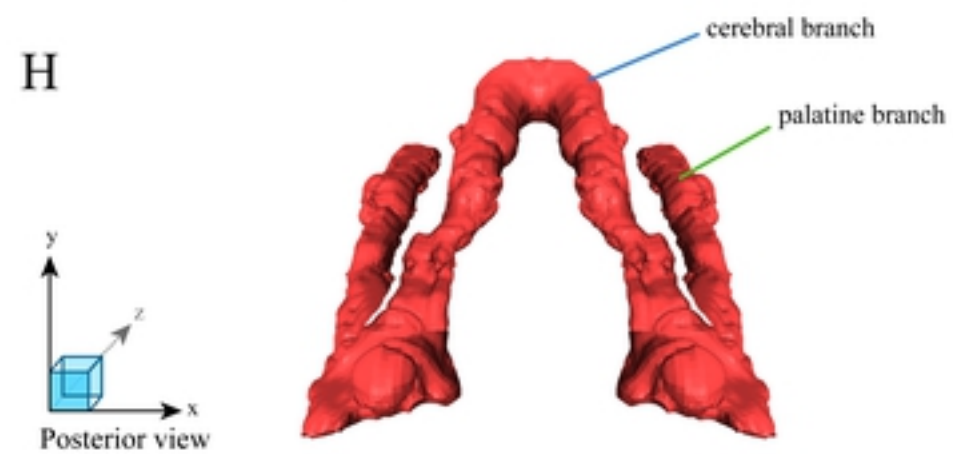



A

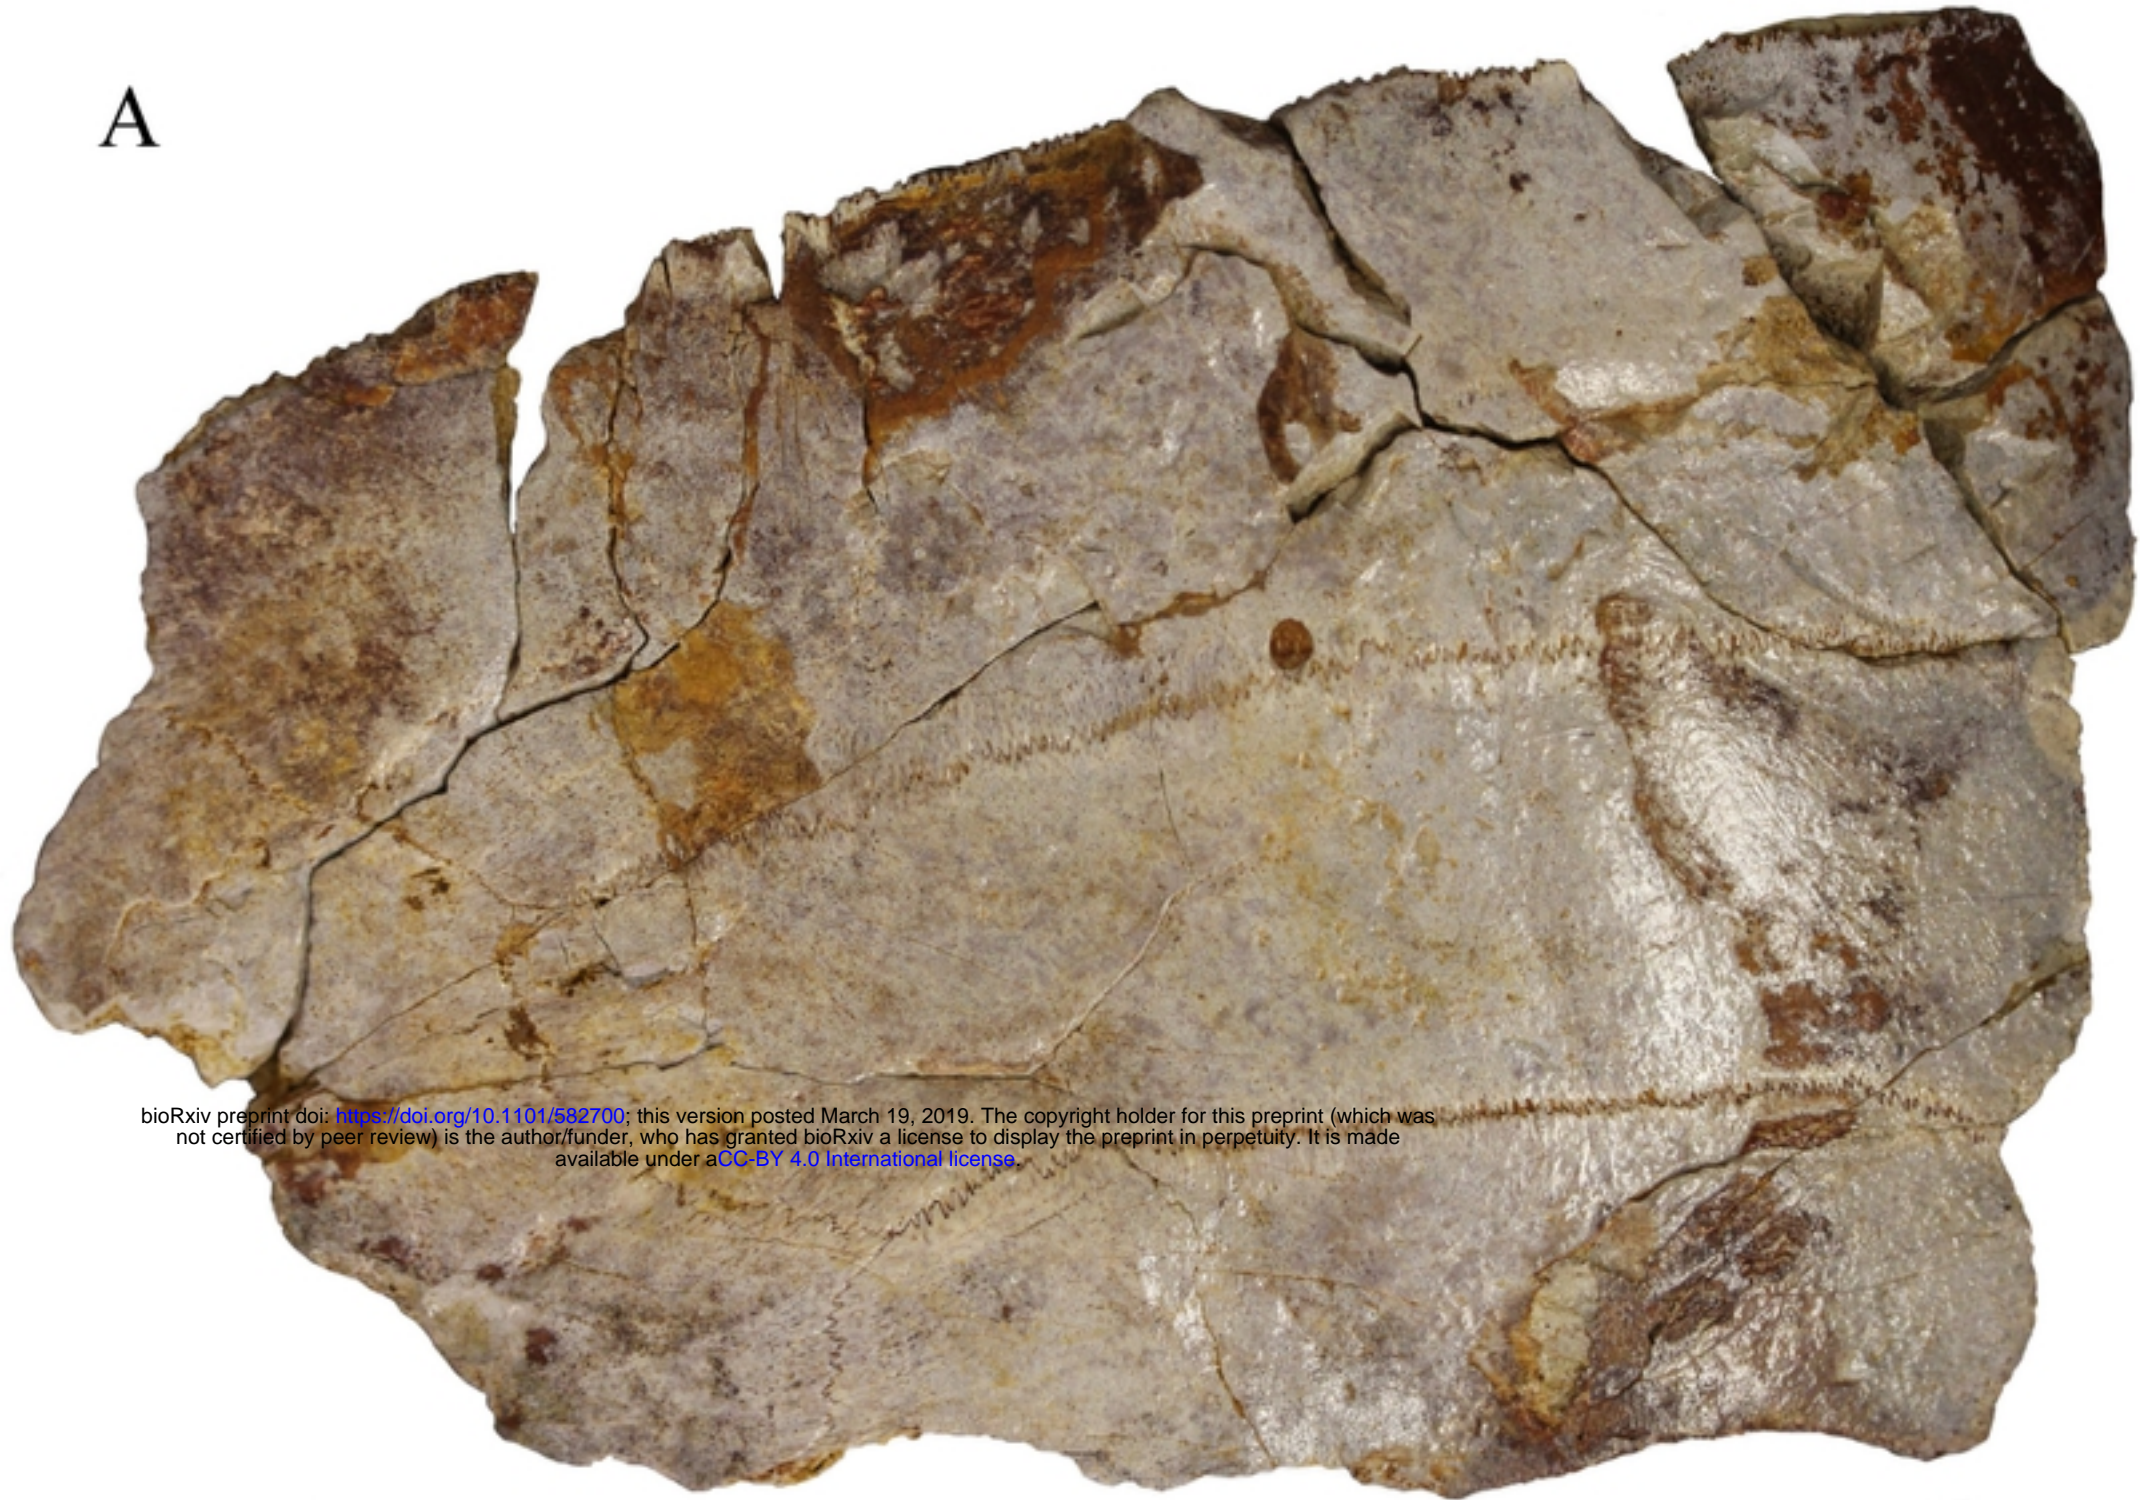

bioRxiv preprint doi: <https://doi.org/10.1101/582700>; this version posted March 19, 2019. The copyright holder for this preprint (which was not certified by peer review) is the author/funder, who has granted bioRxiv a license to display the preprint in perpetuity. It is made available under aCC-BY 4.0 International license.

5 cm

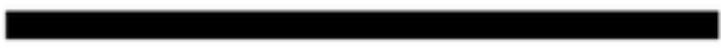

B

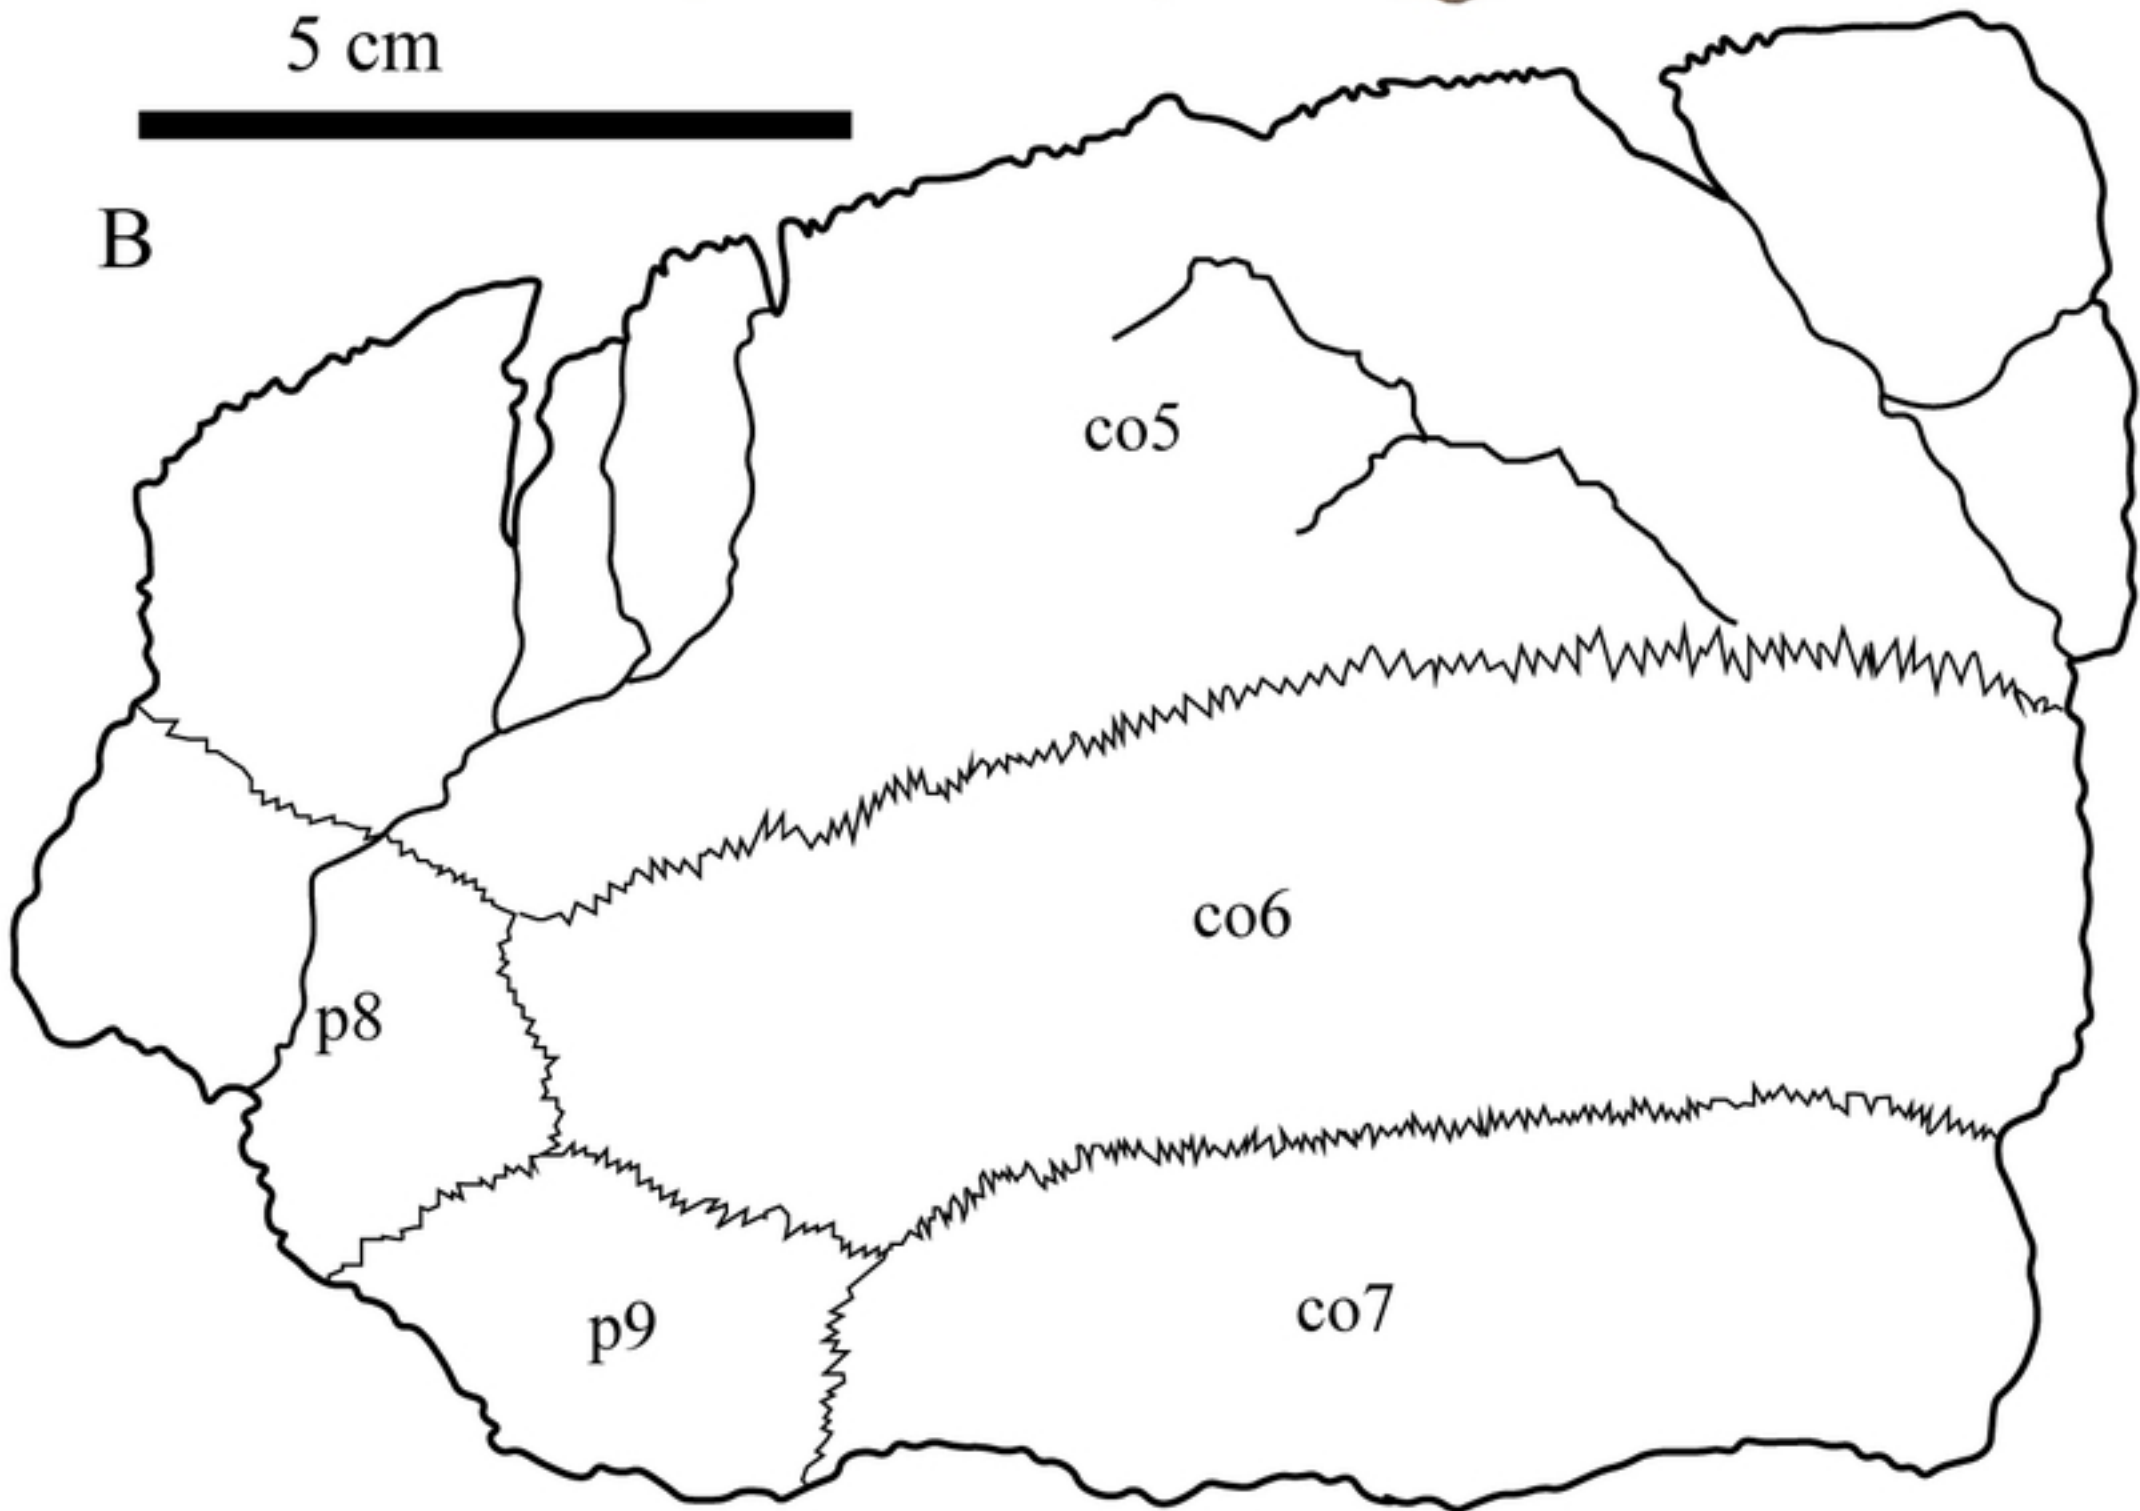

Figure



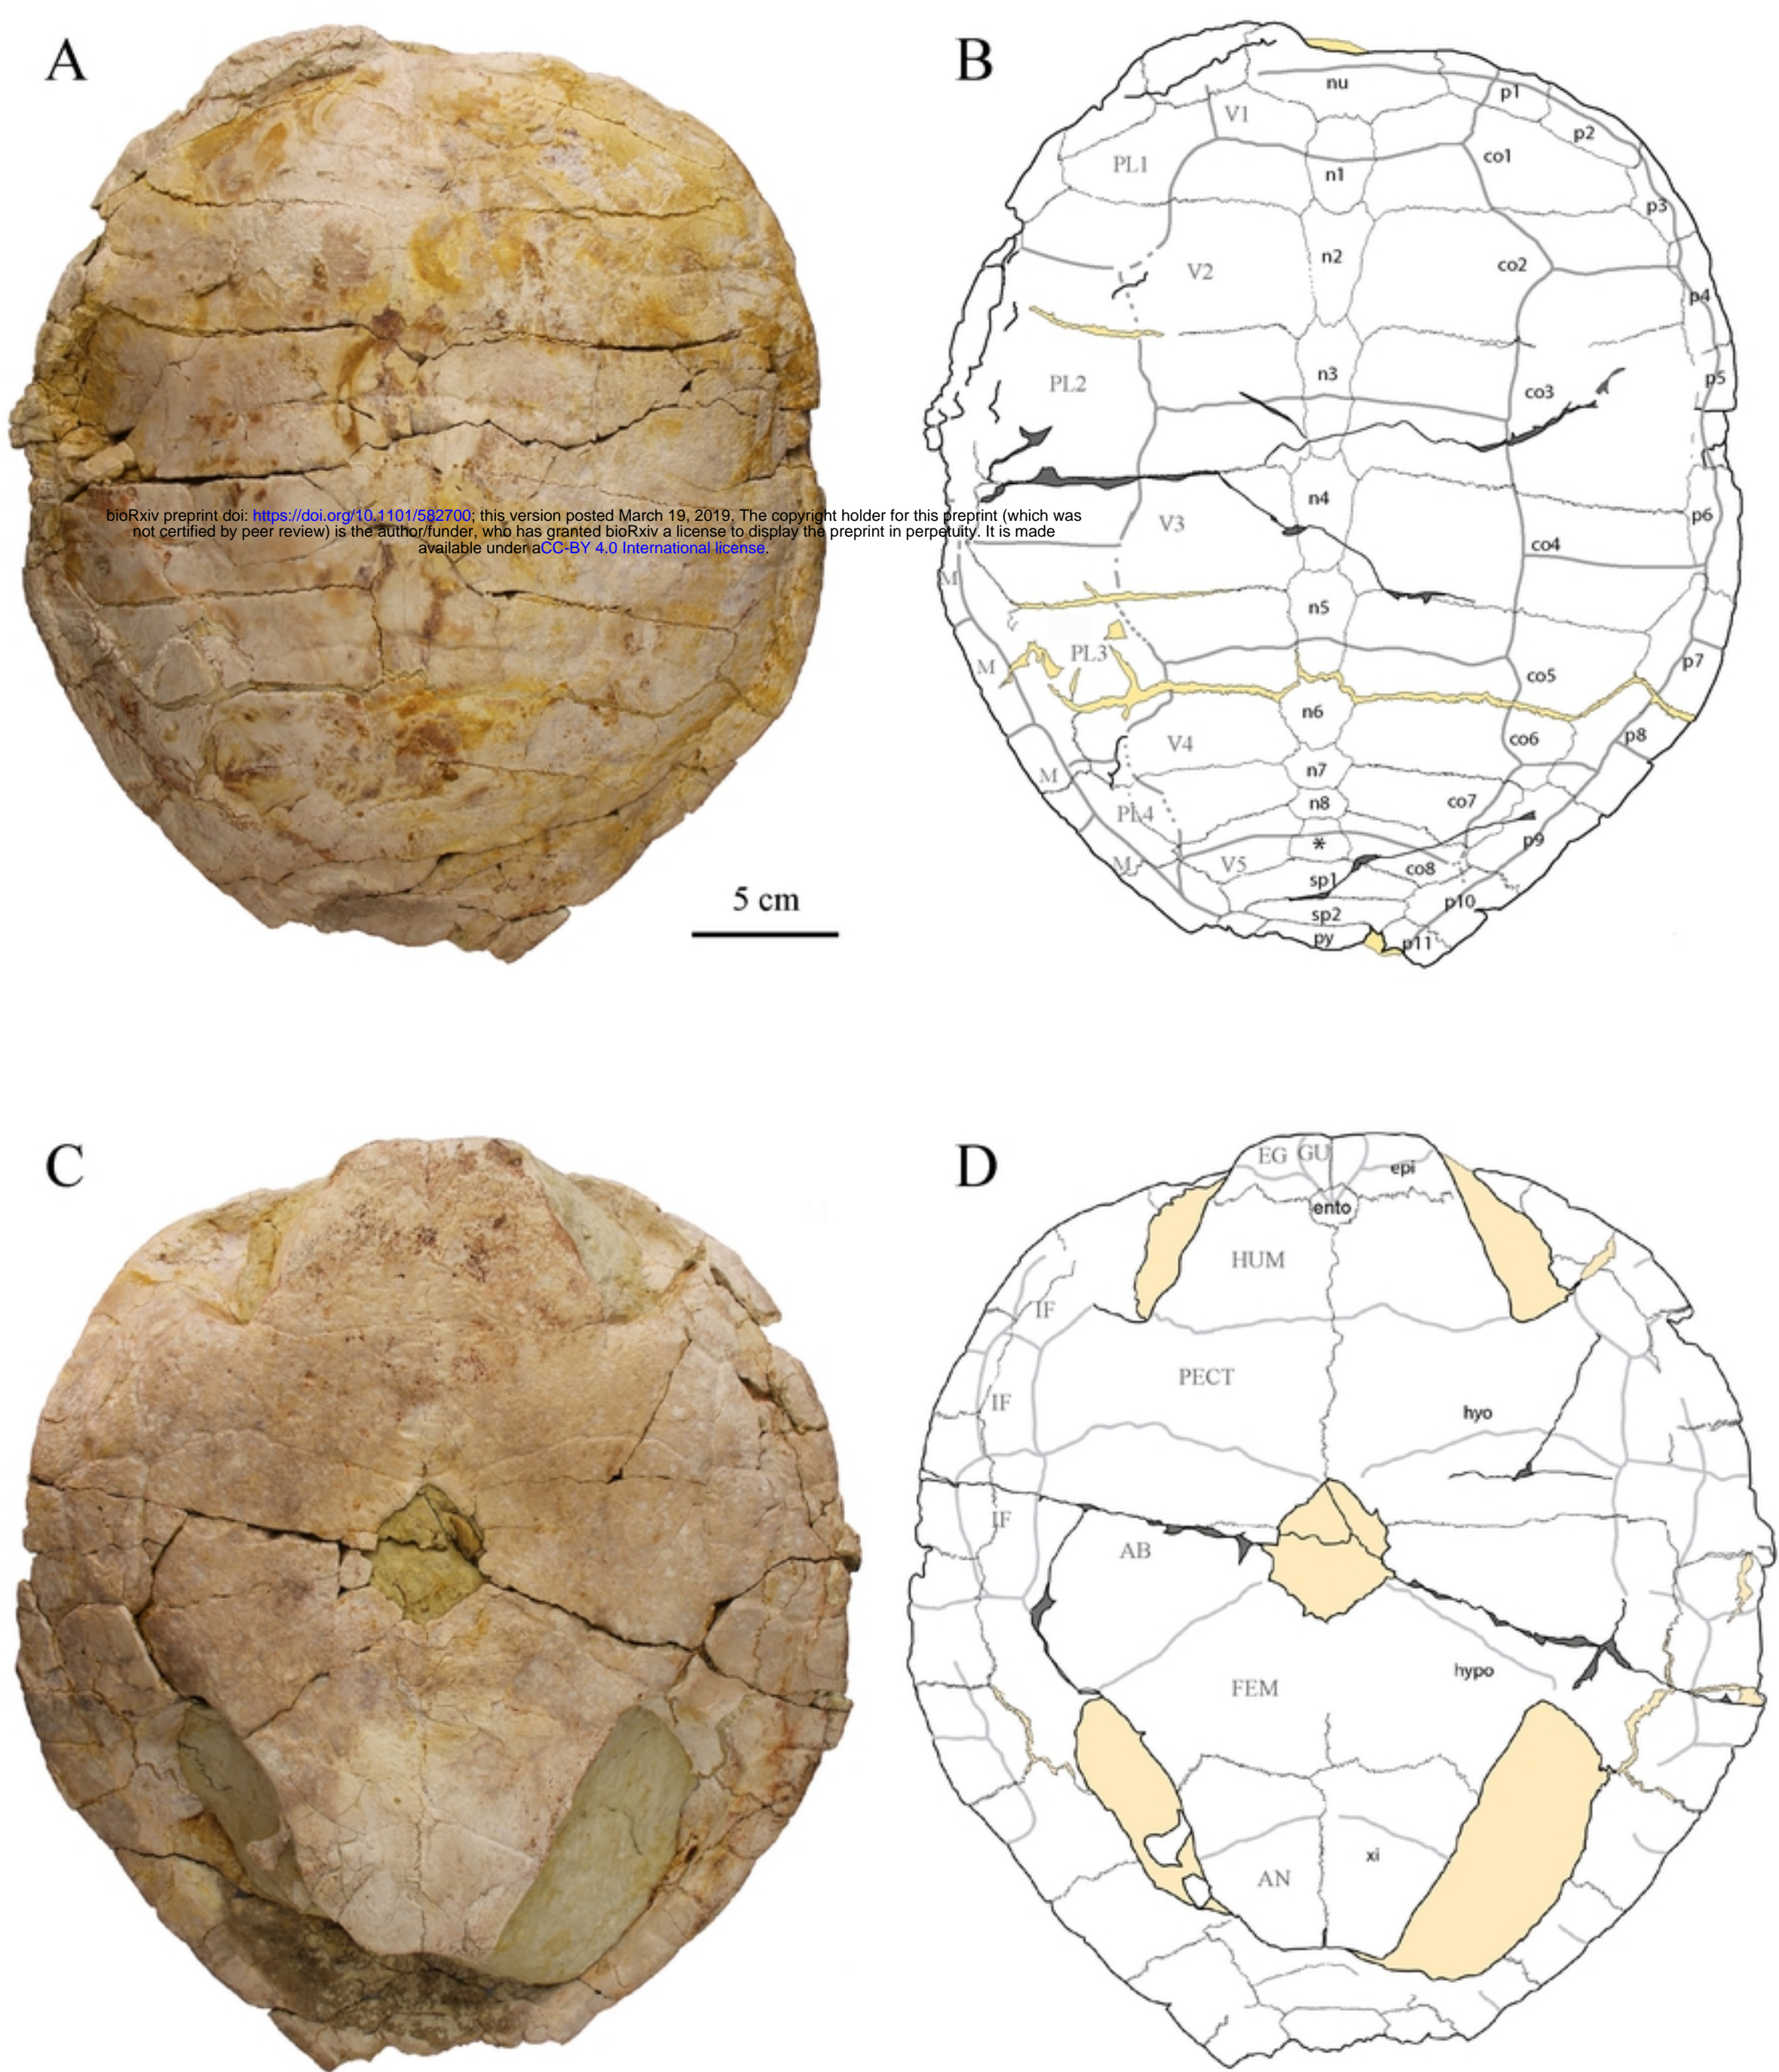

Figure



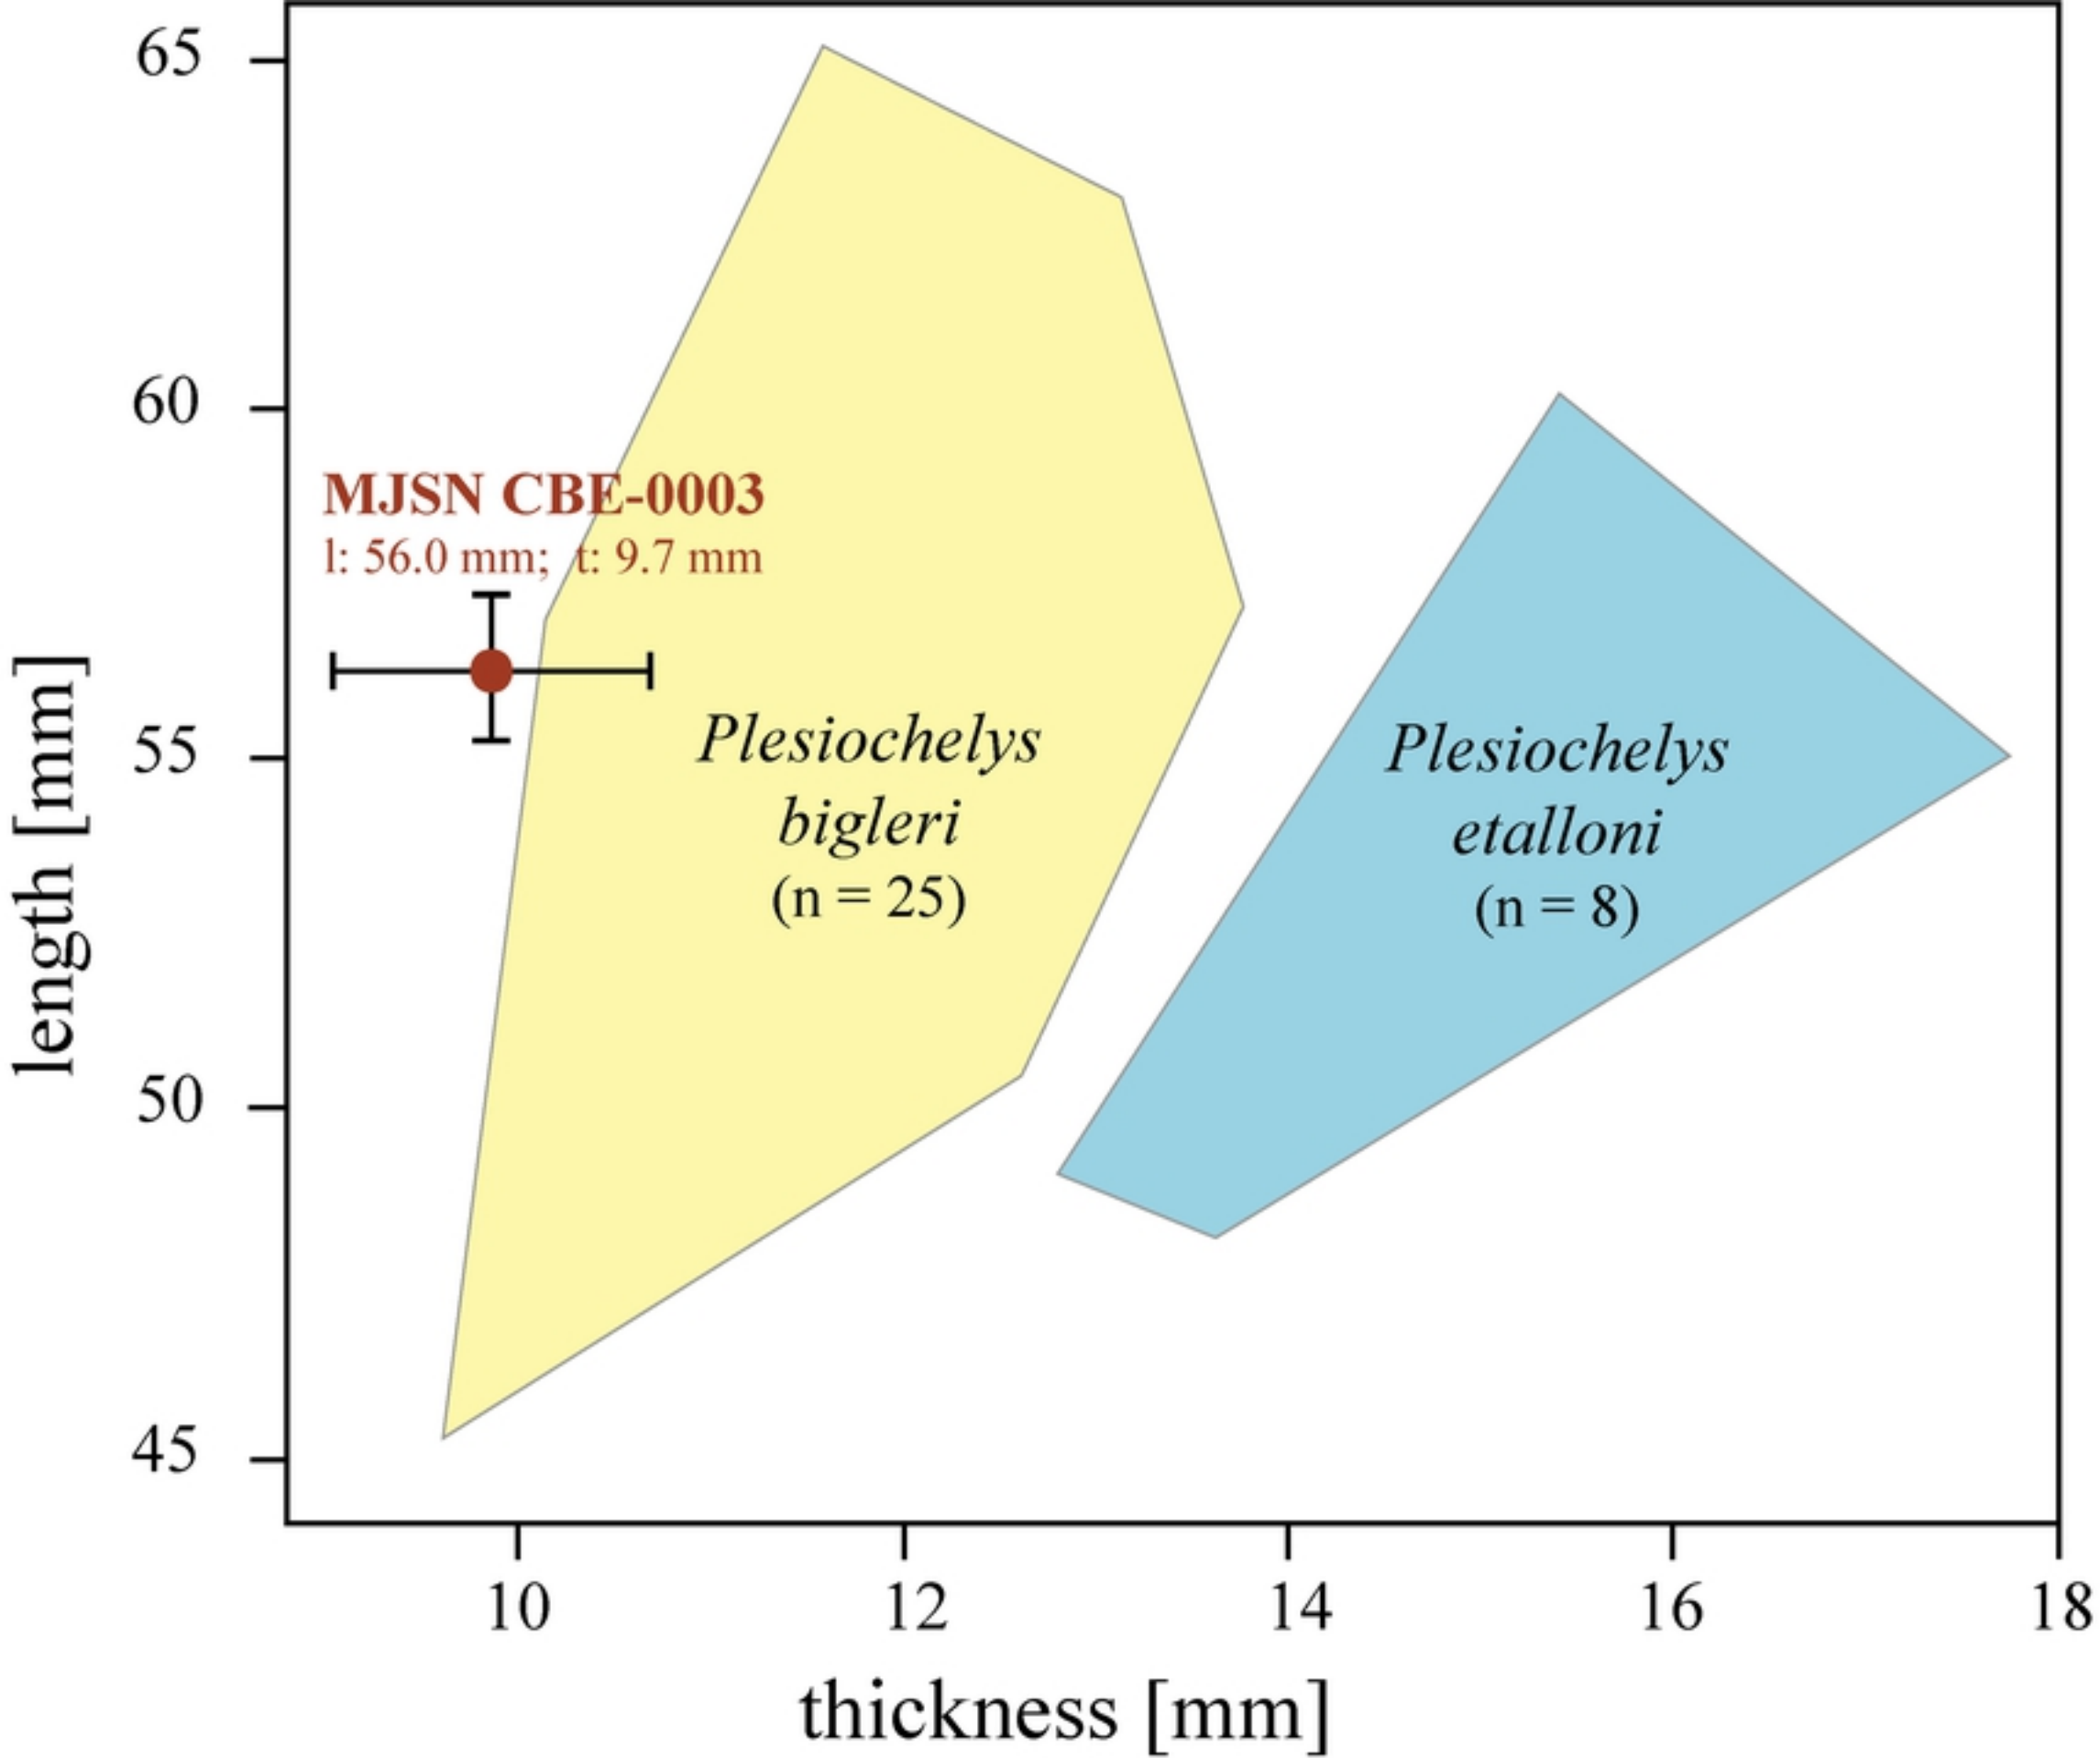

Figure

A

B

C

D

bioRxiv preprint doi: <https://doi.org/10.1101/582700>; this version posted March 19, 2019. The copyright holder for this preprint (which was not certified by peer review) is the author/funder, who has granted bioRxiv a license to display the preprint in perpetuity. It is made available under a [CC-BY 4.0 International license](#).

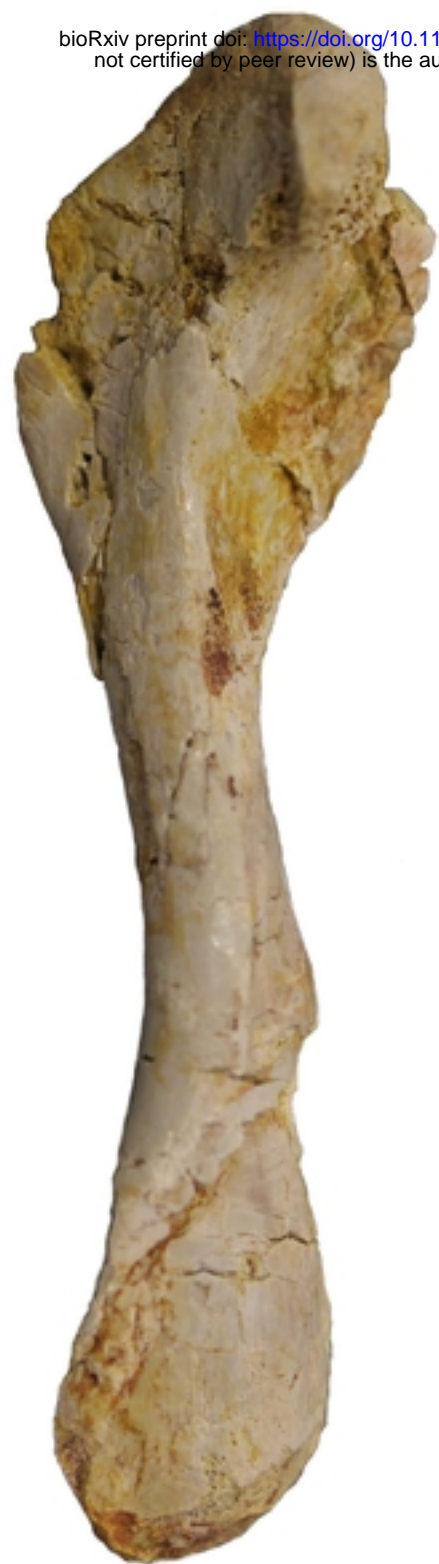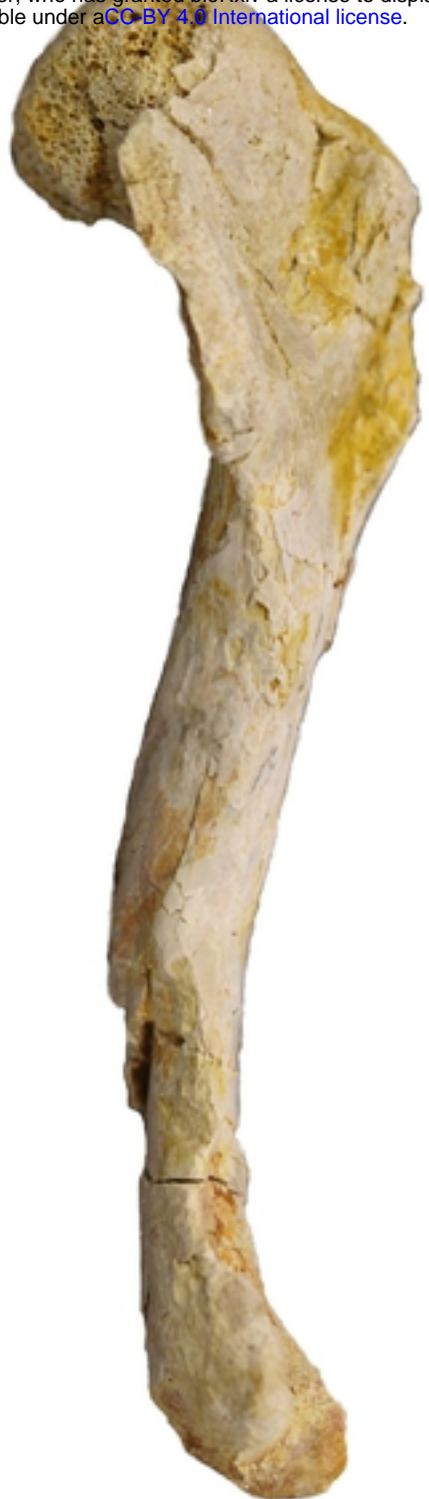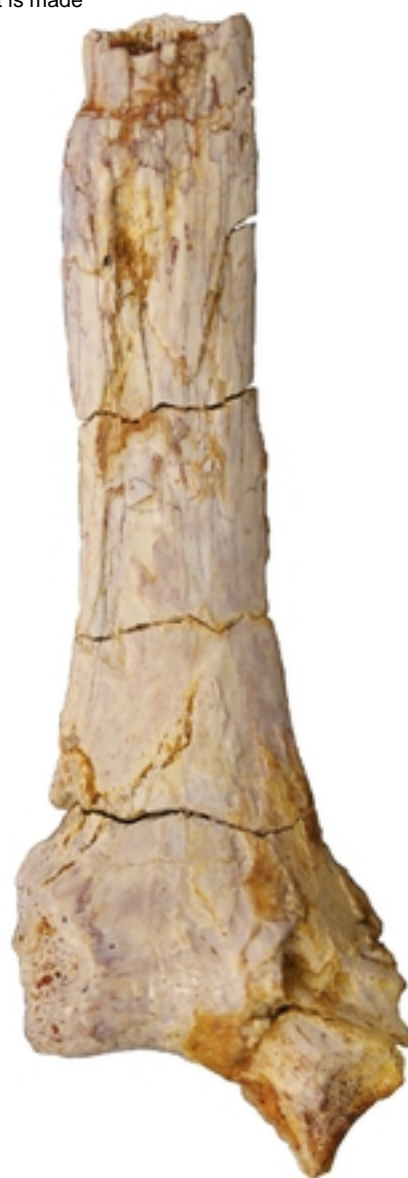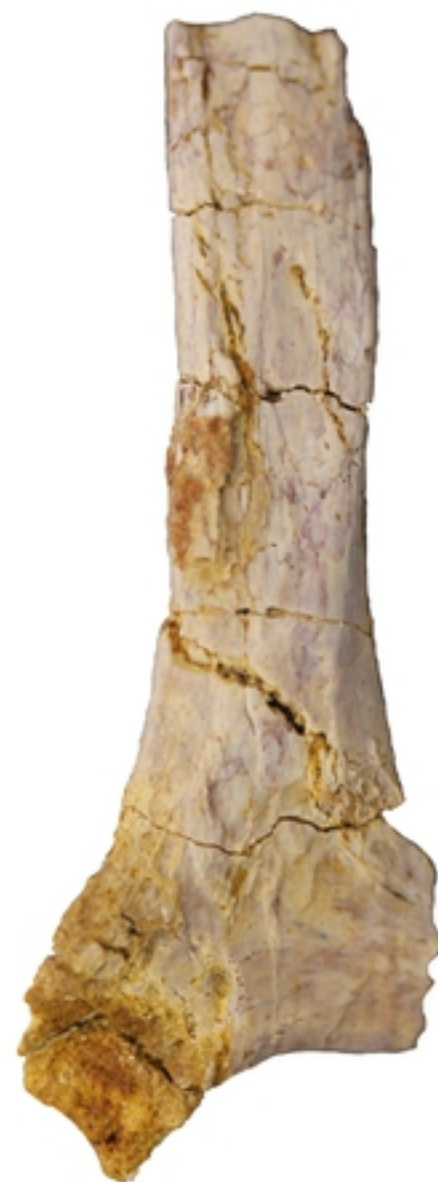

5 cm

E

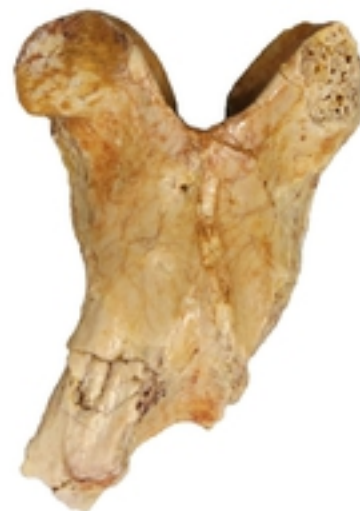

F

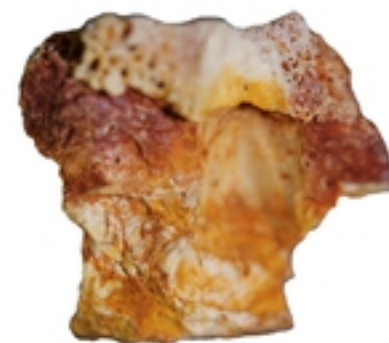

Figure
